# Supplementary material for: Gut microbiome of the largest living rodent harbors unprecedented enzymatic systems to degrade plant polysaccharides
Source: PubMed Central journal article supplement (PMC8810776; doi:10.1038/s41467-022-28310-y), 2022-02-02
Supplement: 41467_2022_28310_MOESM1_ESM.pdf [file 41467_2022_28310_MOESM1_ESM.pdf]

## SUPPLEMENTARY INFORMATION

### **Gut microbiome of the largest living rodent harbors unprecedented enzymatic systems to degrade plant polysaccharides**

Lucelia Cabral<sup>1#</sup>, Gabriela F. Persinoti<sup>1##</sup>, Douglas A. A. Paixão<sup>1#</sup>, Marcele P. Martins<sup>1,2</sup>, Mariana A. B. Morais<sup>1</sup>, Mariana Chinaglia<sup>1,2</sup>, Mariane N. Domingues<sup>1</sup>, Mauricio L. Sforca<sup>3</sup>, Renan A. S. Pirolla<sup>1</sup>, Wesley C. Generoso<sup>1</sup>, Clelton A. dos Santos<sup>1</sup>, Lucas F. Maciel<sup>1</sup>, Nicolas Terrapon<sup>4,5</sup>, Vincent Lombard<sup>4,5</sup>, Bernard Henrissat<sup>6,7</sup>, Mario T. Murakami<sup>1\*</sup>

<sup>1</sup>Brazilian Biorenewables National Laboratory, Brazilian Center for Research in Energy and Materials, Campinas, São Paulo, Brazil.

<sup>2</sup>Graduate Program in Functional and Molecular Biology, Institute of Biology, University of Campinas, Campinas, SP, Brazil

<sup>3</sup>Brazilian Biosciences National Laboratory, Brazilian Center for Research in Energy and Materials, Campinas, São Paulo, Brazil.

<sup>4</sup>The Institut National de la Recherche Agronomique, USC 1408 AFMB, F-13288 Marseille, France.

<sup>5</sup>Architecture et Fonction des Macromolécules Biologiques, CNRS, Aix-Marseille Université, Marseille, France.

<sup>6</sup>Department of Biotechnology and Biomedicine (DTU Bioengineering), Technical University of Denmark, DK-2800 Kgs. Lyngby, Denmark

<sup>7</sup>Department of Biological Sciences, King Abdulaziz University, Jeddah, Saudi Arabia.

<sup>#</sup>These authors contributed equally: Cabral L, Persinoti GF, Paixão DAA.

\*Correspondence should be addressed to M.T.M. ([mario.murakami@lnbr.cnpem.br](mailto:mario.murakami@lnbr.cnpem.br)) and

G.F.P. ([gabriela.persinoti@lnbr.cnpem.br](mailto:gabriela.persinoti@lnbr.cnpem.br))

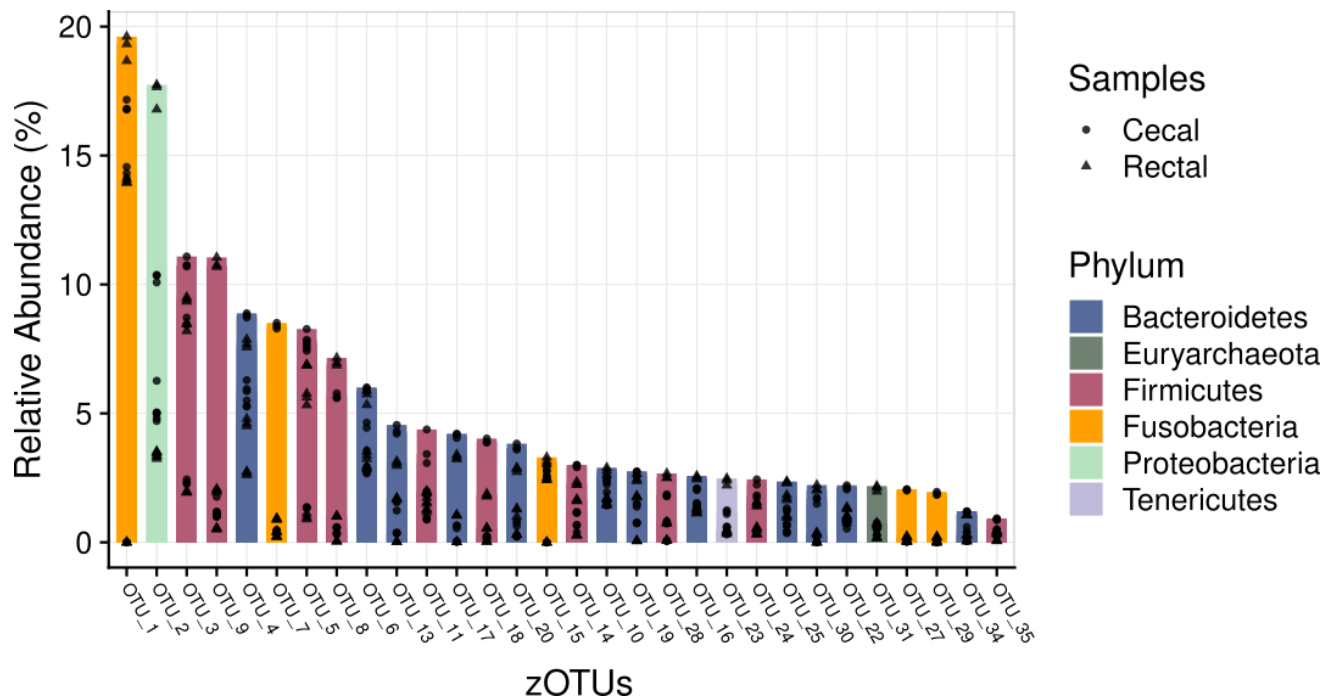

**Supplementary Fig. 1. Top-most abundant zOTUs (Exact Operational Taxonomic Units) identified by 16S rRNA gene target sequencing in capybara cecal and rectal samples.** The data points were obtained from three independent experiments with three technical replicates, using fresh samples collected from the cecum and recto of three wild animals by abdominal surgical procedure. Source data are provided as a Source Data file.

**a**

Tree scale: 0.01

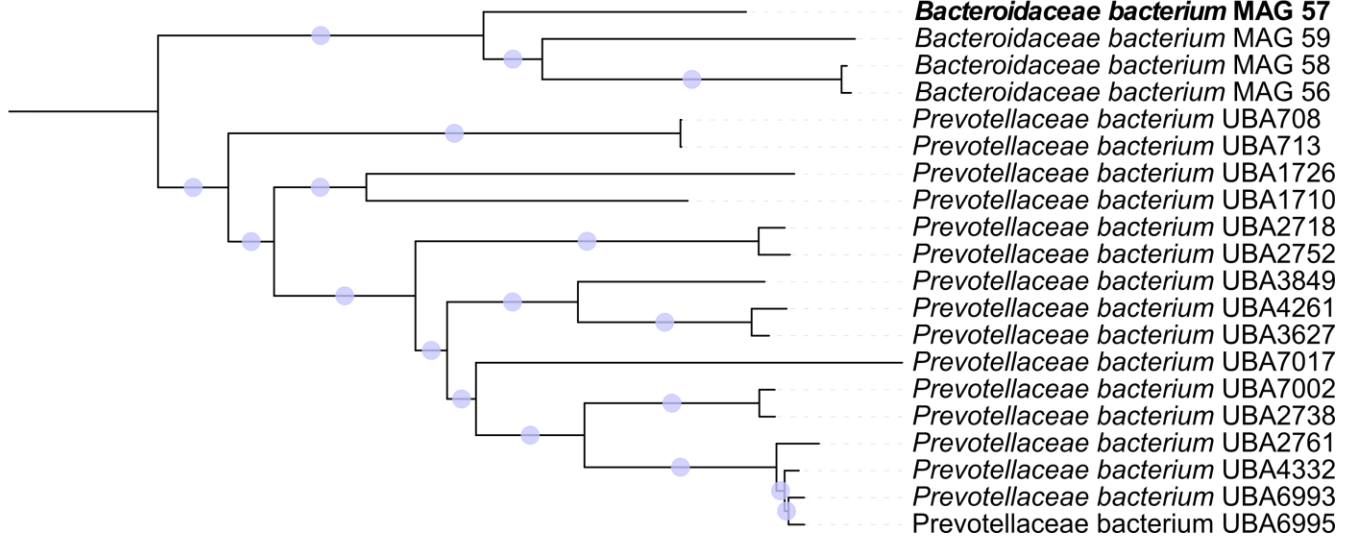**b**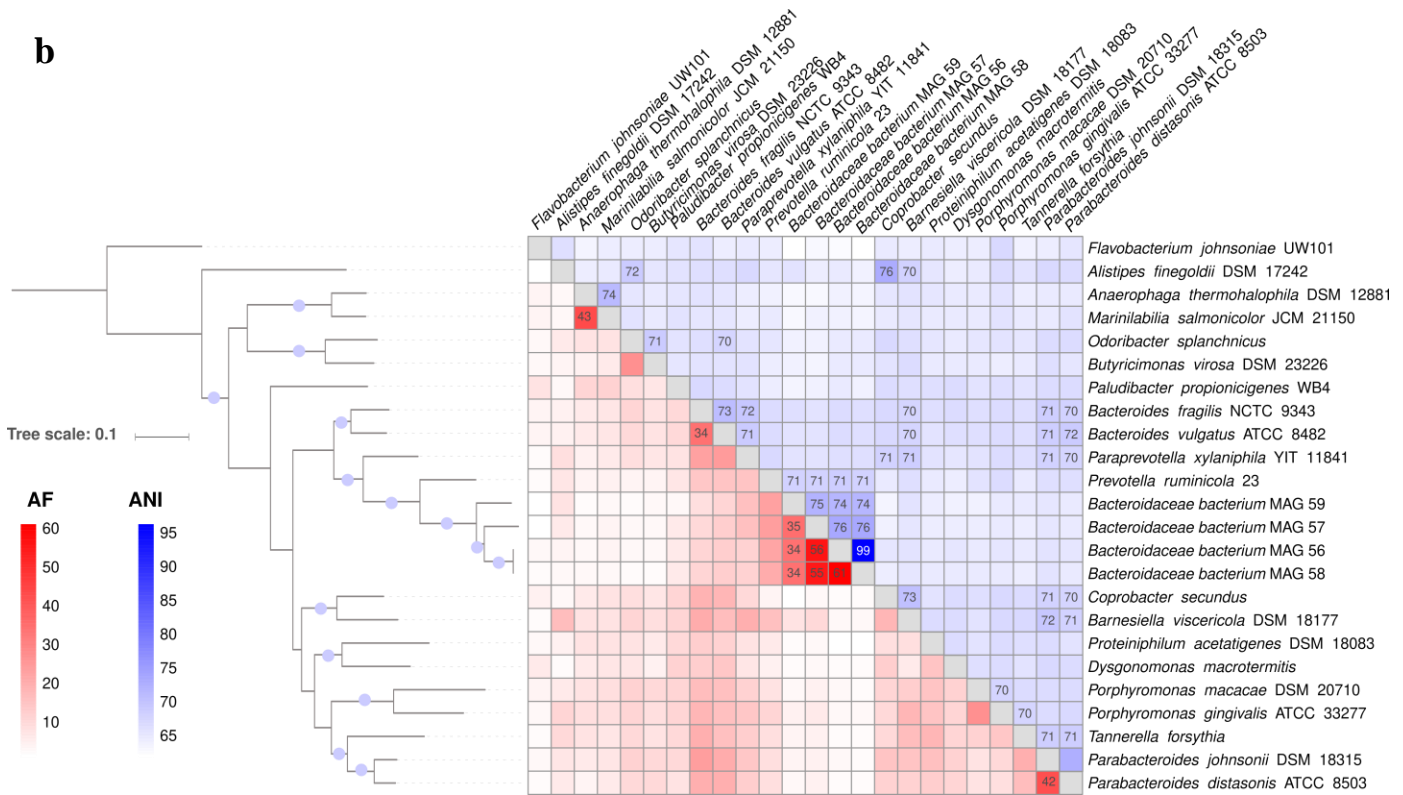

**Supplementary Fig. 2. Genome-wide comparisons of *Bacteroidaceae bacterium* MAG57 genome.** **a**, Phylogenetic relationship of *Bacteroidaceae bacterium* MAG57 genome and *Bacteroidaceae* uncultured genomes recovered from the UBA project<sup>1</sup>. Nodes with support values > 80 are indicated by light blue circles. **b**, Average nucleotide identity (blue) and alignment fraction (red) values calculated for reference *Bacteroidetes* genomes and *Bacteroidaceae bacterium* sp. MAG57 coupled with a multi-locus phylogenetic analysis based on concatenated 92 single copy core genes according to UBCG method<sup>2</sup>, using Flavobacteriaceae as outgroup. Nodes support values > 80 are shown.

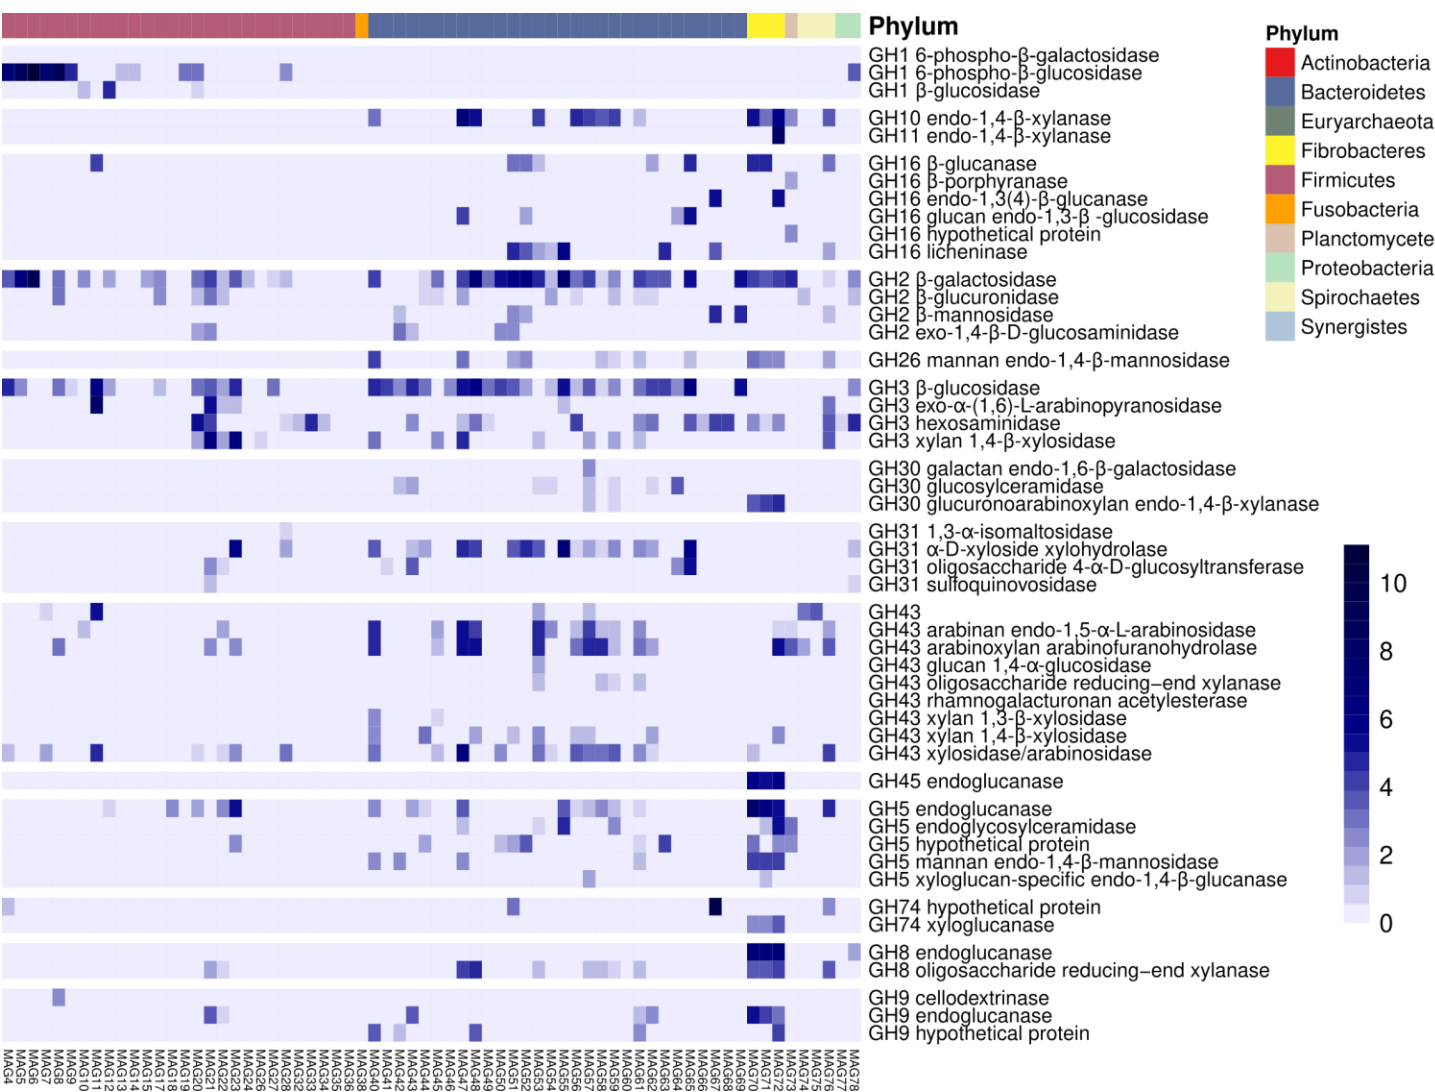

**Supplementary Fig. 3. Abundance of expressed Carbohydrate-Active Enzymes (CAZymes) in the recovered Metagenome-Assembled Genomes (MAGs).** For each MAG, the expression of protein-coding genes associated with the same activity within a CAZy family were added up and log-normalized. Individual genes and their corresponding expression values (Transcripts Per Million - TPM) are shown in Supplementary Data 4. Source data are provided as a Source Data file.

### Heteroxylans:

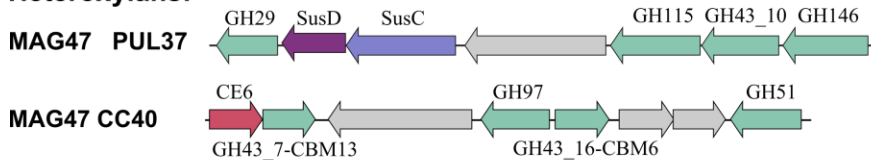

5 Kb

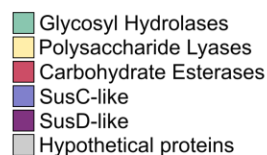

### Mixed-linkage $\beta$ -glucans:

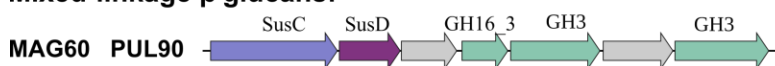

### Xyloglucans:

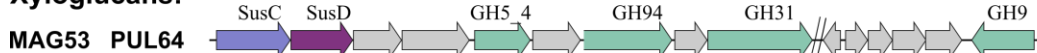

### Mannose-containing carbohydrates:

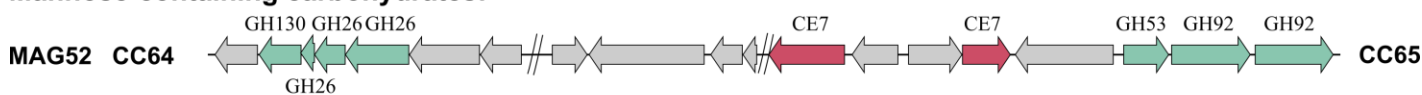

### Homogalacturonans:

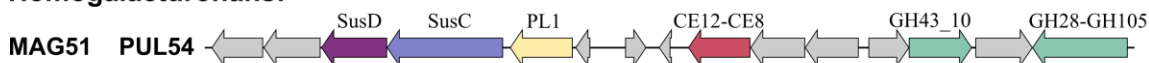

### Starch:

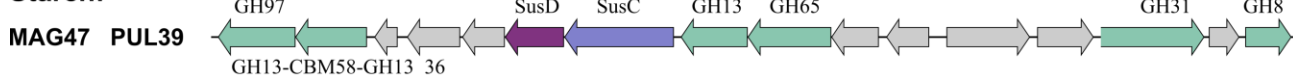

**Supplementary Fig. 4. Main carbohydrate degradation systems: Polysaccharide Utilization Loci (PULs) and Clusters of CAZymes (CCs) identified in the capybara metagenome-assembled genomes (MAGs).** Colored and gray arrows indicate identified and non-identified CAZyme sequences, respectively.

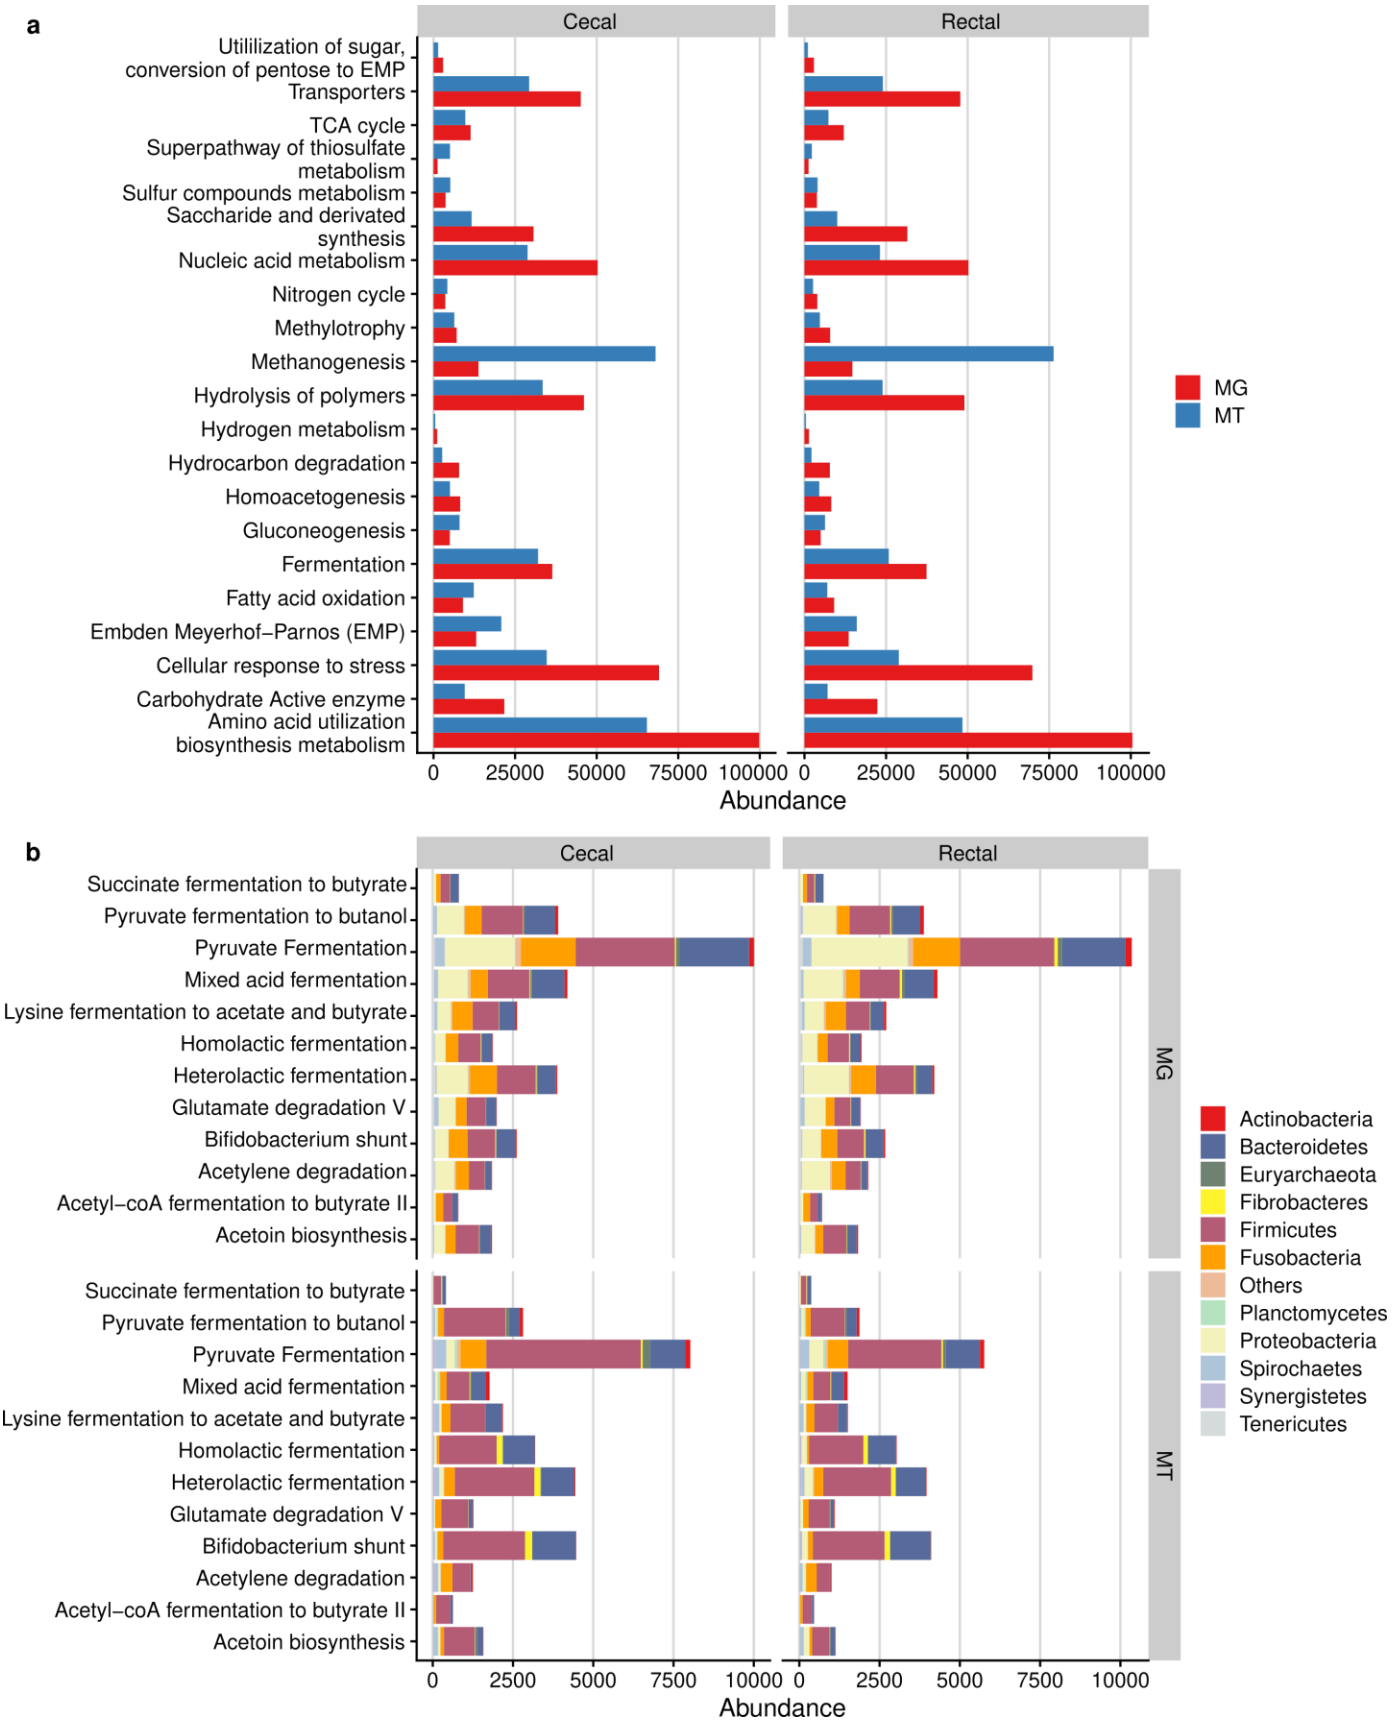

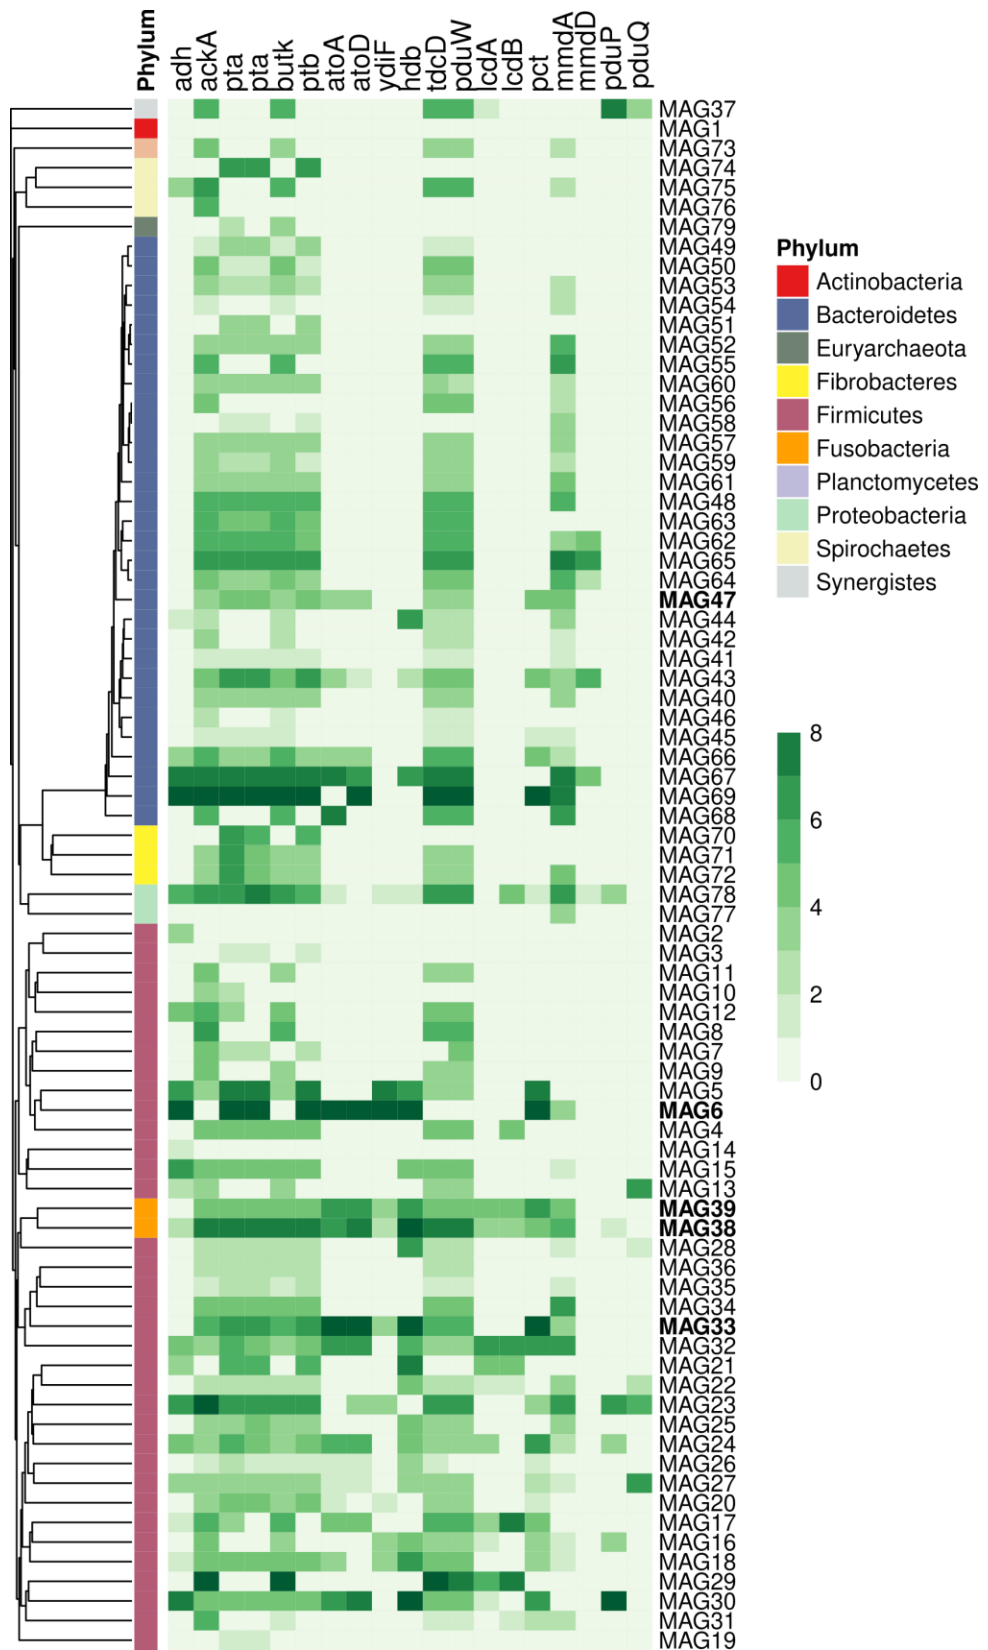

**Supplementary Fig. 6. Expression of genes related to dietary components fermentation into Short Chain Fatty Acids (SCFAs).** For each Metagenome-assembled genome (MAG), the expression of protein-coding genes associated with the same KEGG Orthologous (KO) annotation were added up and log-normalized. Individual genes and their corresponding expression values (TPM – Transcripts Per Million) are shown in the Supplementary Data 7. Genes encoding products - *adh*: alcohol dehydrogenase; *ackA*: acetate kinase; *pta*: phosphate acetyltransferase; *butK*: butyrate kinase; *pib*: phosphate butyryltransferase; *atoA*: Butyryl-CoA:acetate CoA-transferase; *atoD*: Butyryl-CoA:acetate CoA-transferase; *ydiF*: acetate CoA/acetoacetate CoA-transferase; *hdb*: butyryl coA dehydrogenase; *tdcD*: propionate kinase; *pduW*: propionate kinase; *lcdA*: lactoyl-CoA dehydratase subunit alpha; *lcdB*: lactoyl-CoA dehydratase subunit beta; *pct*: propionate CoA-transferase; *mmdA*: methylmalonyl coA decarboxylase; *mmdD*: methylmalonyl coA decarboxylase; *pduP*: propionaldehyde dehydrogenase; and *pduQ*: propanol dehydrogenase. Source data are provided as a Source Data file.



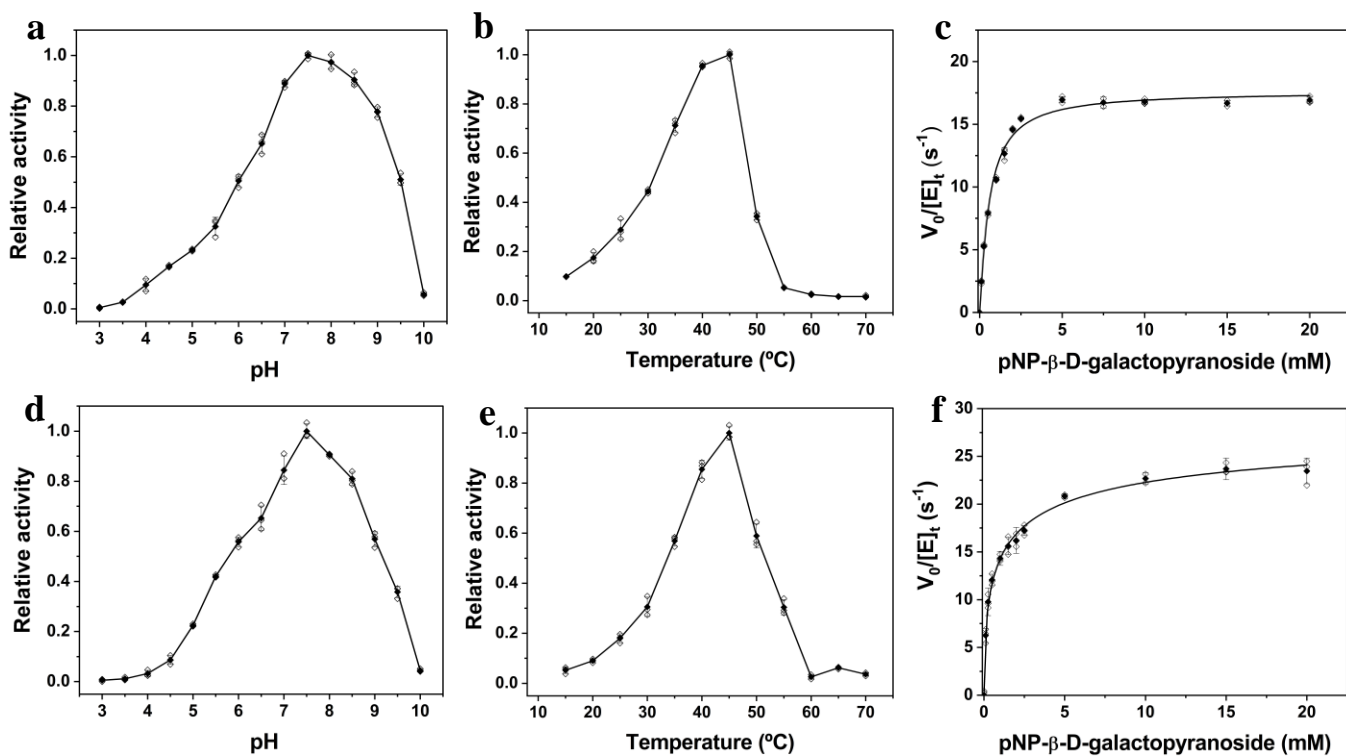

**Supplementary Fig. 7. Biochemical and kinetic characterization of the founding members of the GH173 Family.** Effects of pH and temperature on relative activity and kinetic curves. **a-c**, CapGH173 (PBMDCECB\_44807). **d-f**, BXY\_26070 (CBK67650.1). Both enzymes were assayed against pNP-β-D-Galactopyranoside at pH 7.5 and 45 °C. Kinetic parameters are presented in Table 1. Results are expressed as mean ± SD from three independent experiments (n=3). Data points are shown as empty symbols. Source data are provided as a Source Data file.



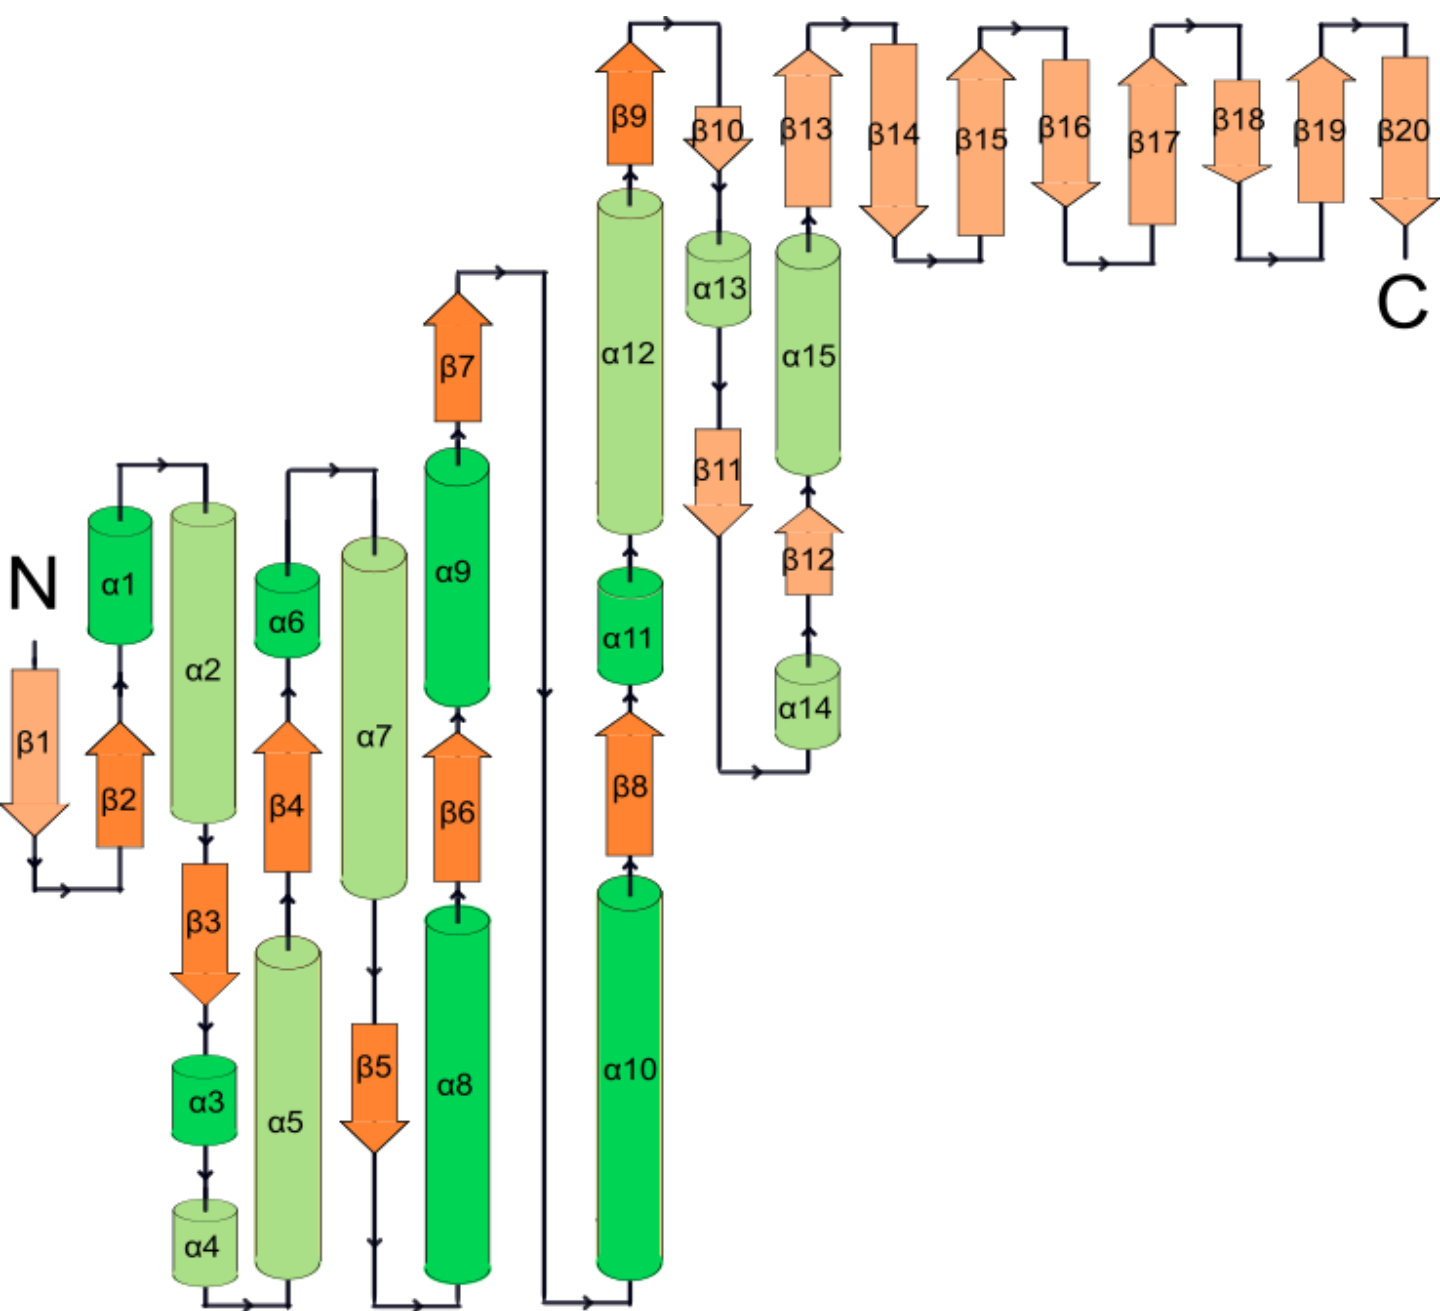

**Supplementary Fig. 8. Prediction of the structural topology of the GH173 family according to RoseTTAFold<sup>3</sup> structural model.** The predictor generated a model with 0.74 of confidence, and the protein topology was obtained using PDBsum<sup>4</sup>. The secondary structural elements forming the (α/β)-barrel are represented by dark colors.

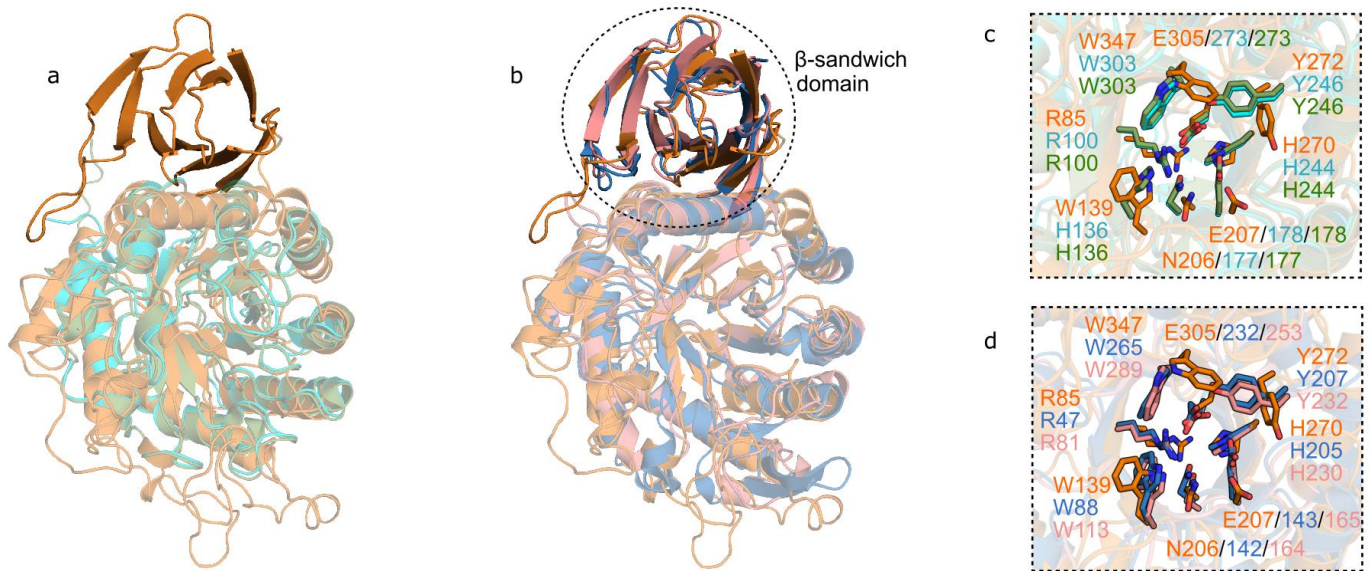

**Supplementary Fig. 9. Structural comparison between CapGH173 model and (a) GH5 and (b) GH30 members.** GH5 members are the endo- $\beta$ -1,4-mannanases from *Streptomyces thermolilacinus* NBRC14274 (StMan, subfamily GH5\_8, PDB code 3WSU, rmsd 3.27 Å, in cyan<sup>5</sup>) and from *Streptomyces* sp. SirexAA-E (SACTE\_2347, subfamily GH5\_8, PDB code 4FK9, 4.41 Å rmsd, in green<sup>6</sup>). GH30 members are the endo- $\beta$ -1,4-xylanase from *Ruminiclostridium papyrosolvans* C71 (CpXyn30A, subfamily GH30\_8, PDB code 4FMV, rmsd 2.07 Å, in blue<sup>7</sup>) and the glucuronoarabinoxylan-specific endo- $\beta$ -1,4-xylanase from *Erwinia chrysanthemi* (XynA, subfamily GH30\_8, PDB code 1NOF, rmsd 2.12 Å, in salmon<sup>8</sup>). **c-d**, Identification of conserved clan GH-A residues in the CapGH173 model. In panel (c), CapGH173 model is in orange and the GH5 endo- $\beta$ -1,4-mannanases StMan (PDB code 3WSU) and SACTE\_2347 (PDB code 4FK9) are in cyan and green, respectively. In panel (d), CapGH173 model is also in orange and the GH30 CpXyn30A and XynA are in blue and salmon, respectively. The residues E305 and E207 correspond to the nucleophile and acid/base, respectively (inferred by structural superposition). Structural alignment was performed using the "super" command in Pymol (The PyMOL Molecular Graphics System, Schrödinger, LLC, New York).

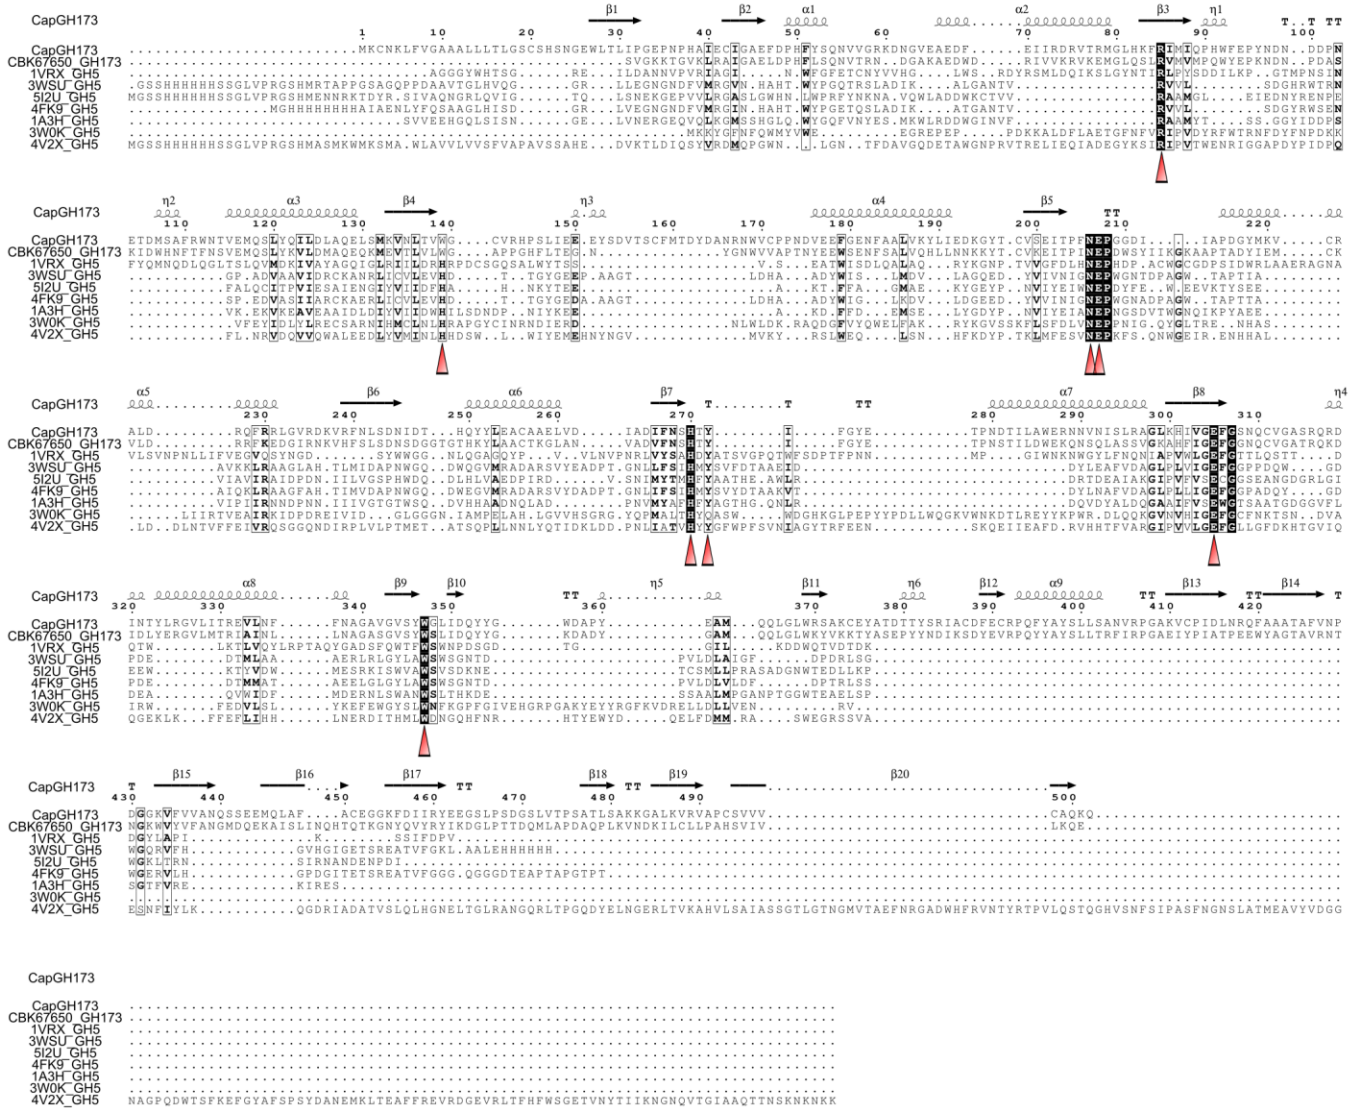

**Supplementary Fig. 10.** Multiple sequence alignment between GH173 members (CapGH173 and CBK67650 (BXY\_26070)) and the GH5 members, described in Supplementary Table 3. Red triangles indicate the conserved residues from Clan GH-A and the inferred catalytic residues. ClustalΩ from MPI Bioinformatics<sup>9</sup> was used to generate the multiple sequence alignments, with manual adjustment based on conserved residues according to structural comparisons. ESPrpt 3.0<sup>10</sup> was used to generate the alignment image.



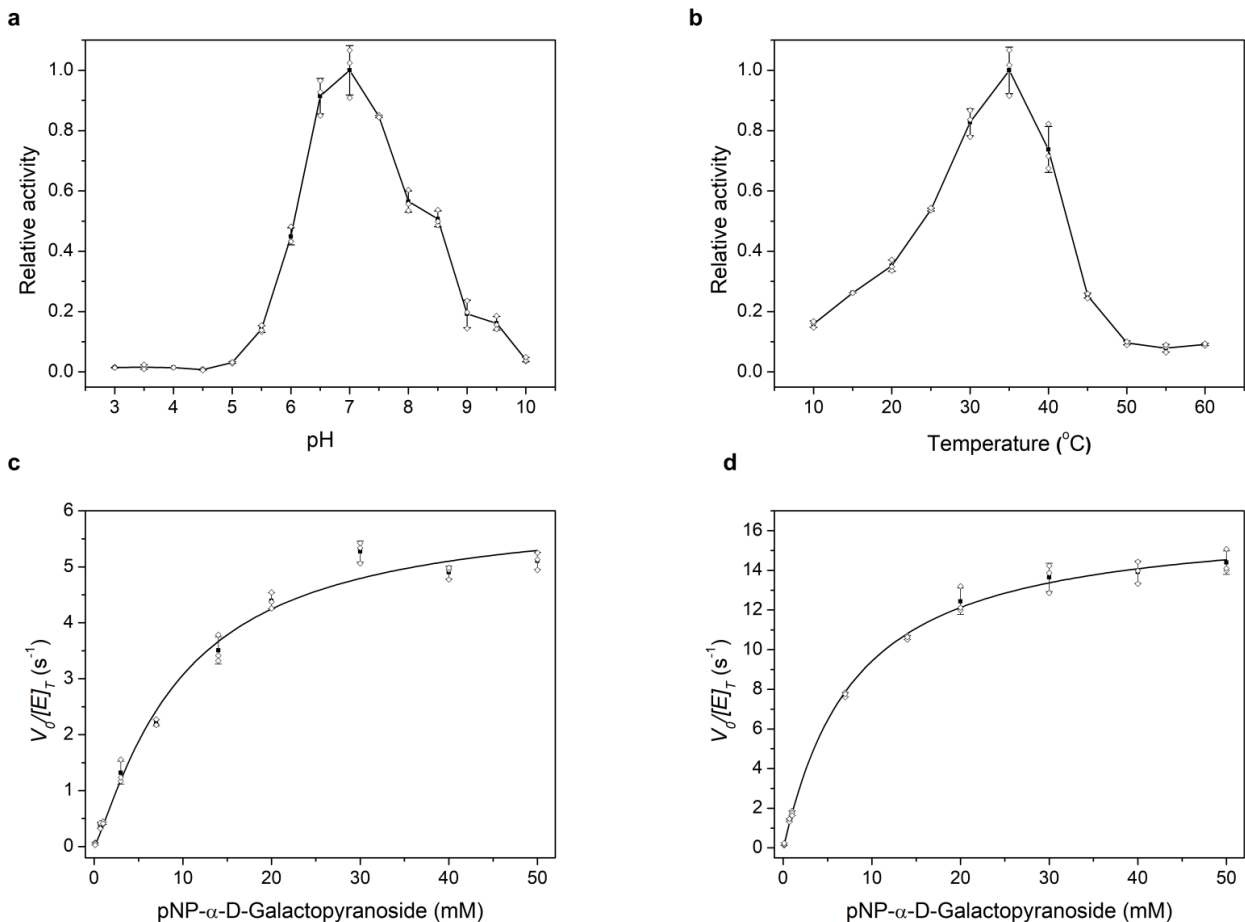

**Supplementary Fig. 12. Biochemical and kinetic characterization of CapGH97.** Effects of pH (**a**) and temperature (**b**) on the catalytic activity. Kinetic curves of pNP- $\alpha$ -D-Galactopyranoside without CaCl<sub>2</sub> (**c**) and with the addition of 5 mM CaCl<sub>2</sub> (**d**) assessed at 35 °C and pH 7.0. The kinetic parameters are presented in Table 1. Results are expressed as mean  $\pm$  SD from three independent experiments (n=3). Data points are shown as empty symbols. Source data are provided as a Source Data file.

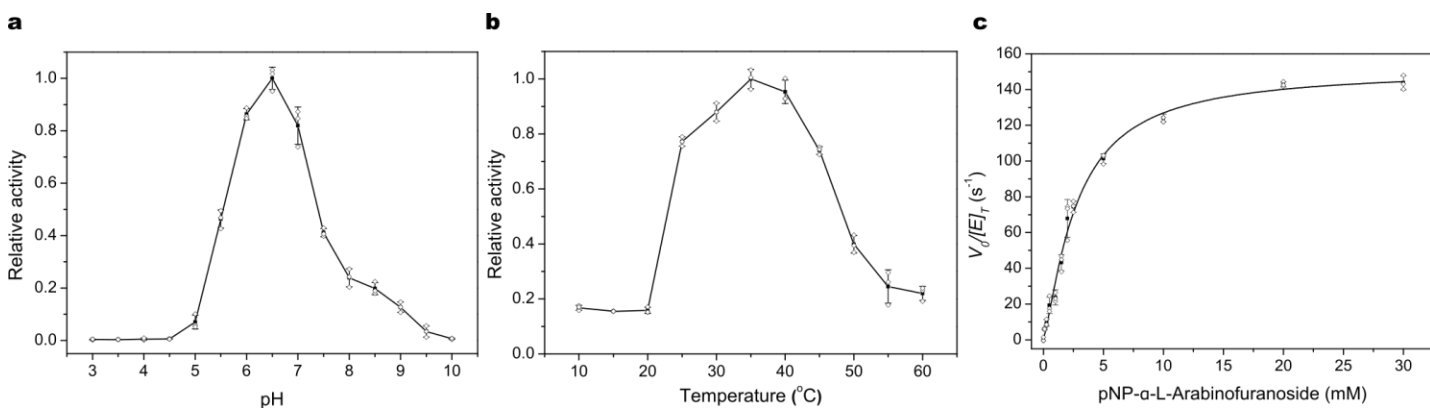

**Supplementary Fig. 13. Biochemical characterization of CapGH43\_12.** Effects of temperature (**a**) and pH (**b**) on the catalytic activity. **c**, Saturation curve using pNP- $\alpha$ -L-Arabinofuranoside as substrate (35 °C and pH 6.5). The kinetic parameters are presented in Table 1. Results are expressed as mean  $\pm$  SD from three independent experiments (n=3). Data points are shown as empty symbols. Source data are provided as a Source Data file.



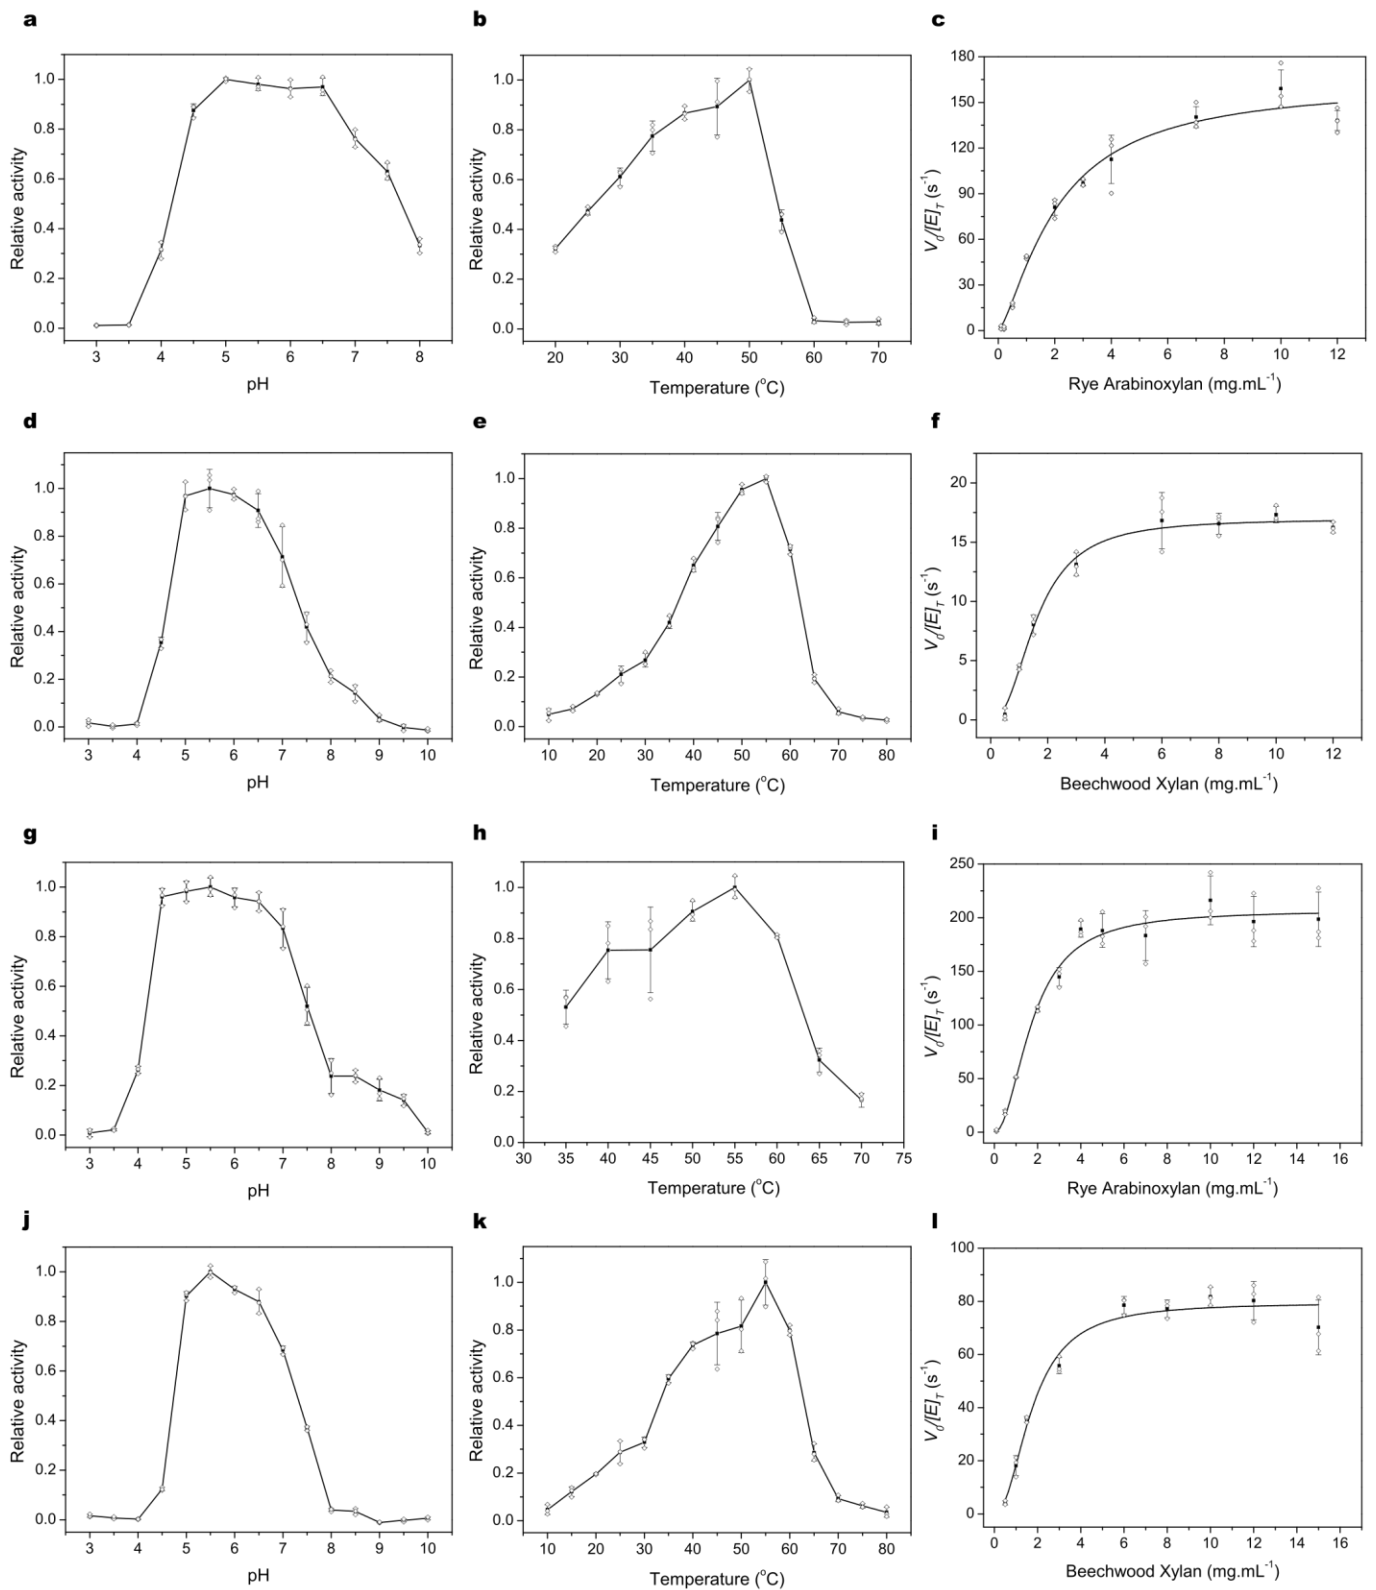

### Supplementary Fig. 14. Biochemical and kinetic characterization of CapGH10.

Effect of pH and temperature on the catalytic activity and saturation curves. **a-c**, CapGH10 full-length enzyme assayed on rye arabinosyran at pH 5.0 and 50 °C. **d-f**, CapGH10 full-length enzyme assayed on beechwood xylan at pH 5.5 and 55 °C. **g-i**, CapGH10<sub>T</sub> (truncated GH10 catalytic domain) assayed on rye arabinosyran at pH 5.5 and 55 °C. **j-l**, CapGH10<sub>T</sub> assayed on beechwood xylan at pH 5.5 and 55 °C. The kinetic parameters are presented in Table 1. Results are expressed as mean ± SD from three independent experiments (n=3). Data points are shown as empty symbols. Source data are provided as a Source Data file.



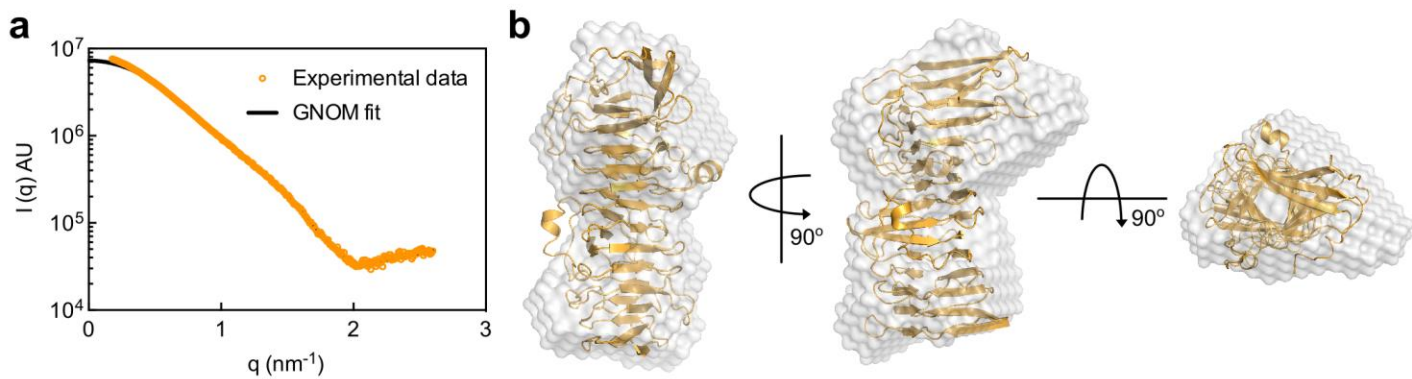

**Supplementary Fig. 15. SAXS data of the CapCBM89 domain.** **a**, Experimental SAXS curve (open circles) and theoretical scattering profile (black line) computed from the  $P(r)$  function, obtained with GNOM program<sup>11</sup>. ( $I(q)$  AU is represented in log scale). **b**, Crystal structure of the CapCBM89 structure fitted into the molecular envelope calculated from SAXS data. Source data are provided as a Source Data file.

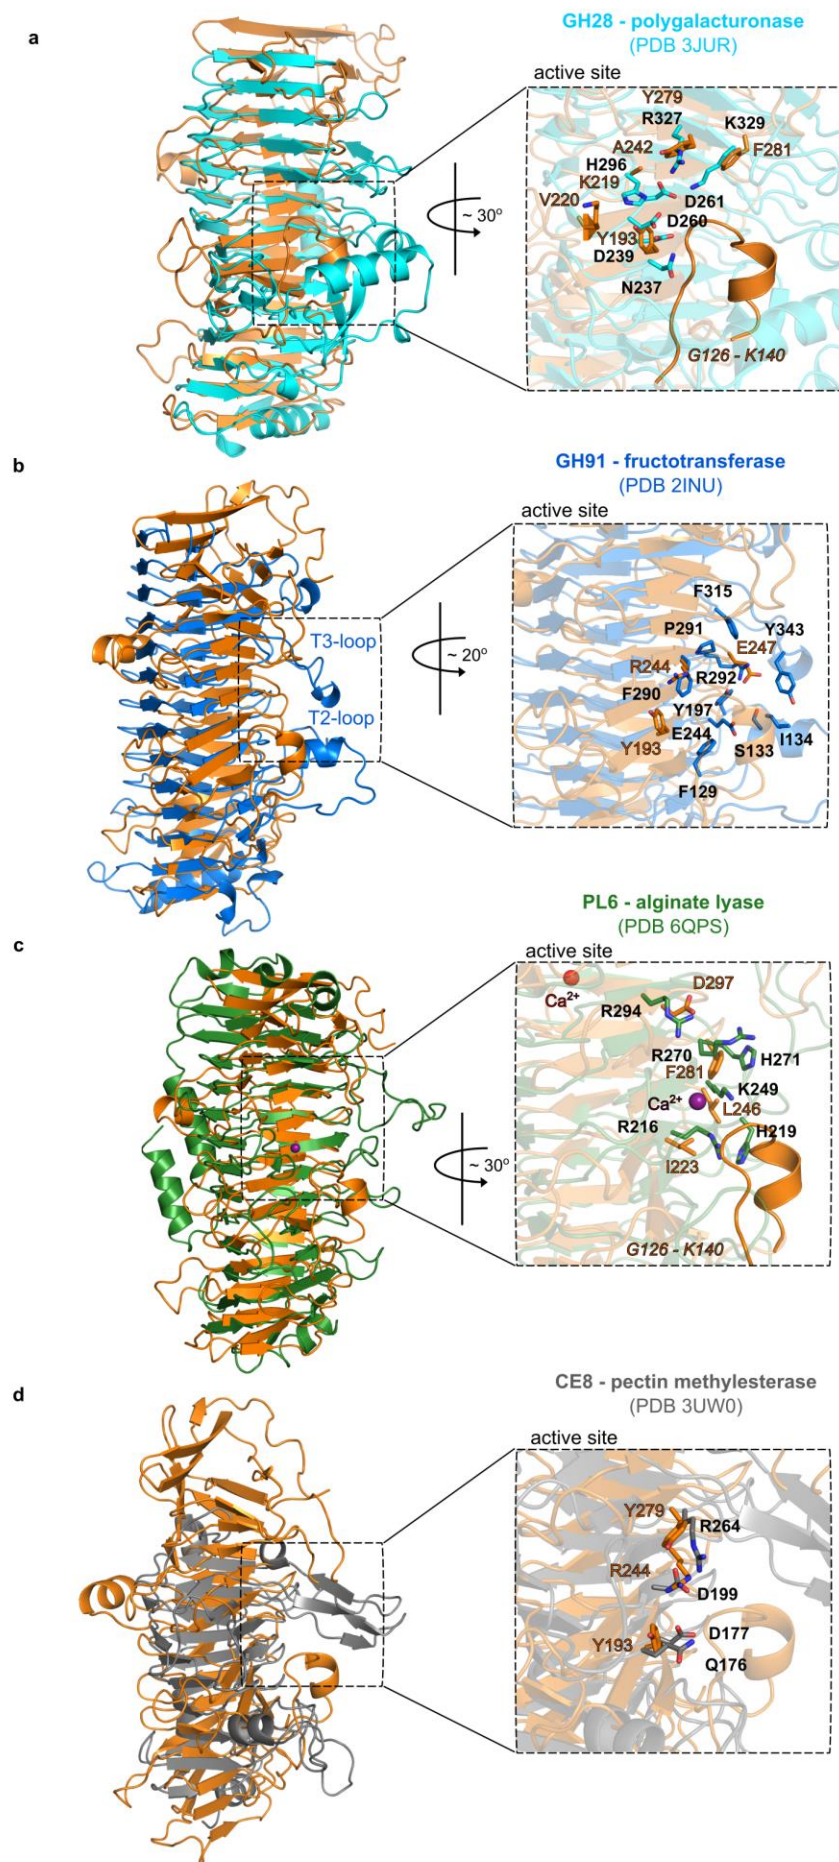

**Supplementary Fig. 16. Structural comparisons of CapCBM89 with  $\beta$ -helix Carbohydrate-Active Enzymes database (CAZy) families.**

**a**, *Thermotoga maritima* GH28 exo-polygalacturonase (PDB code 3JUR) (cyan<sup>12</sup>). **b**, *Bacillus* sp. GH91 fructotransferase (PDB code 2INU) (blue<sup>13</sup>). **c**, *Bacteroides cellulosilyticus* PL6 alginate lyase (PDB code 6QPS) (green<sup>14</sup>). The Ca<sup>2+</sup> ions are represented as red (CapCBM89) and purple (alginate lyase) spheres. **d**, *Yersinia enterocolitica* CE8 pectin methylesterase (PDB code 3UW0) (grey<sup>15</sup>). Structures used for comparisons with CapCBM89 were selected according to higher Q-scores shown in Supplementary Table 7. Structural alignments were performed with PDBeFold<sup>16</sup> and/or with Pymol (The PyMOL Molecular Graphics System, Schrödinger, LLC, New York) and manually adjusted to optimize the alignment of cavities.

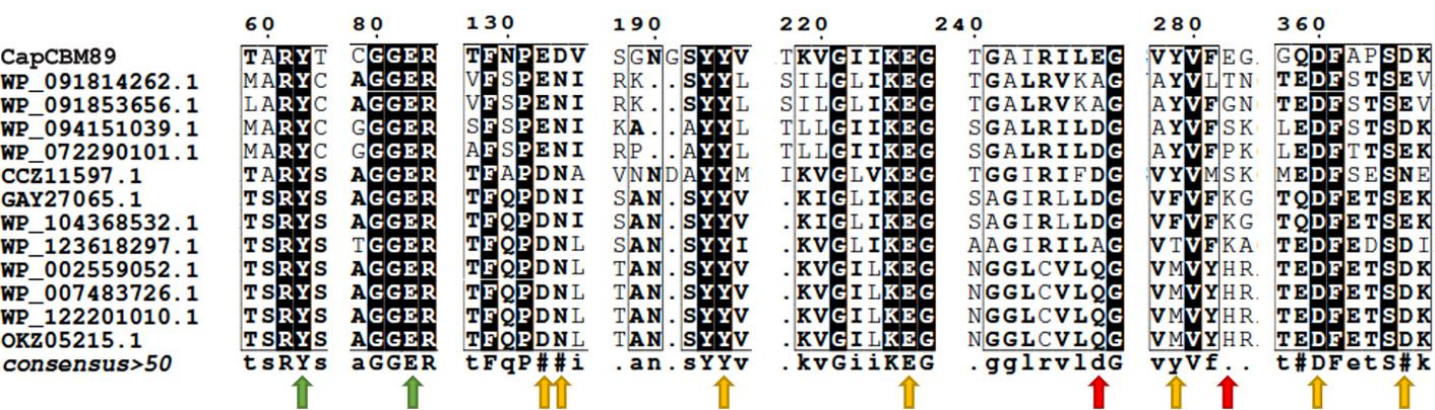

**Supplementary Fig. 17. Sequence alignment of CapCBM89 homologues.** The protein sequences were obtained by BLASTP search conducted with the isolated CapCBM89 domain. Only sequences containing a possibly GH10 member at the C-terminus were employed for alignment and are specified as their GenBank accession code. Identical residues are highlighted by black background. Red arrows indicate residue mutations that hindered protein expression. Green arrows indicate mutations that altered protein migration pattern in affinity gel electrophoresis (AGE) assays, while yellow arrows indicate mutations that did not affect protein migration in AGE assays. For clarity purposes, only relevant sequence fragments were displayed.

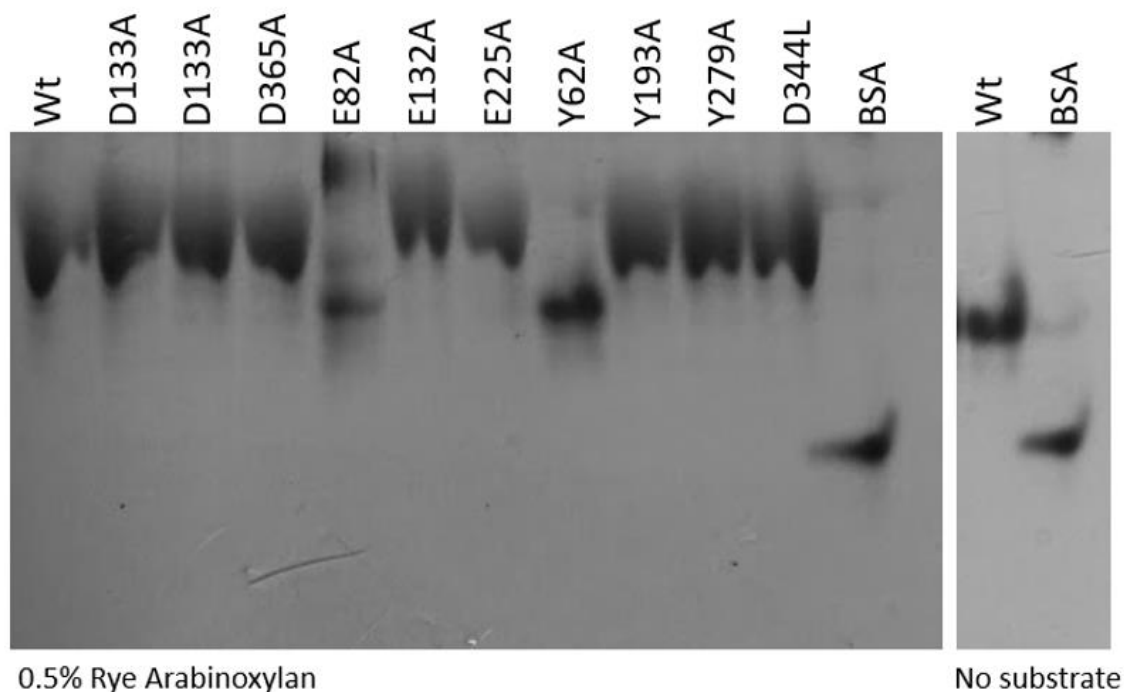

**Supplementary Fig. 18. Affinity gel electrophoresis (AGE) of the wild-type CapCBM89 domain (WT) and point mutants.** AGE assays were performed with the isolated CapCBM89 domain using bovine serum albumin (BSA) as control. AGE experiments were independently performed three times for CapCBM89 WT (n=3) and twice for mutants (n=2) using arabinoxylan as substrate, with similar results. As the same migration pattern was observed for rye arabinoxylan and beechwood xylan, only results for the rye arabinoxylan are displayed in the figure. By the same reason, only CapCBM89 WT is shown in the control gel, as either WT or mutants migrate equally in AGE without substrates. Source data are provided as a Source Data file.

**Supplementary Table 1: Annotation of hypothetical genes evaluated in this study.**

| <b>GeneID</b>         | <b>Annotation</b>    | <b>Identity (%)</b> | <b>Expressed in soluble form</b> | <b>Activity</b>        | <b>HHpred best hit</b> | <b>HHpred e-value*</b> |
|-----------------------|----------------------|---------------------|----------------------------------|------------------------|------------------------|------------------------|
| <b>PBMDCECB_19409</b> | hypothetical protein | 14                  | +                                | n.d.                   | Pectinesterase A       | 3.90E-27               |
| <b>PBMDCECB_19412</b> | hypothetical protein | 13                  | +++                              | n.d.                   | alginate lyase         | 1.70E-12               |
| <b>PBMDCECB_19416</b> | hypothetical protein | 14                  | +++                              | n.d.                   | alginate lyase         | 1.1E-19                |
| <b>PBMDCECB_19417</b> | hypothetical protein | 21                  | n.d.                             | -                      | Dextranase             | 1.3E-49                |
| <b>PBMDCECB_19418</b> | hypothetical protein | 16                  | +++                              | n.d.                   | Alginate lyase         | 1.6E-60                |
| <b>PBMDCECB_19419</b> | hypothetical protein | 15                  | ++                               | n.d.                   | LC-Est1C (E.C.3.1.1.1) | 9.6e-16                |
| <b>PBMDCECB_09522</b> | hypothetical protein | 17                  | +                                | n.d.                   | Glycoside hydrolase    | 1.2E-39                |
| <b>PBMDCECB_44807</b> | hypothetical protein | 12                  | +                                | $\beta$ -galactosidase | Xylanase B             | 5.0E-35                |

\*e-value: Expected number of false positives per database search with a score at least as good as the score of the sequence match, calculated by HHpred server <https://toolkit.tuebingen.mpg.de/tools/hhpred>. n.d. : not detected.



**Supplementary Table 2: Isolation source and predicted cellular localization of GH173 family members.**

| GeneID                | Organism                                    | Phylum               | Isolation source                                                                         | SignalP*   | BUSCA**                      |
|-----------------------|---------------------------------------------|----------------------|------------------------------------------------------------------------------------------|------------|------------------------------|
| <b>PBMDCECB_44807</b> | <b><i>Bacteroidales bacterium</i> MAG42</b> | <b>Bacteroidetes</b> | <b>Capybara gut microbiome</b>                                                           | <b>Yes</b> | <b>C:extracellular space</b> |
| WP_019149822.1        | <i>Alistipes senegalensis</i>               | Bacteroidetes        | feces                                                                                    | Yes        | C:extracellular space        |
| WP_056620438.1        | <i>Paenibacillus</i> sp.                    | Firmicutes           | soil                                                                                     | Yes        | C:extracellular space        |
| PGCNHMPG_00931        | <i>Bacteroidales bacterium</i> UBA2817      | Bacteroidetes        | rumen                                                                                    | Yes        | C:cytoplasm                  |
| ADELKDKB_00142        | <i>Mageeibacillus</i> sp. UBA1257           | Firmicutes           | Switch grass fiber attached community in cow rumen                                       | Yes        | C:plasma membrane            |
| PHGEIAKJ_00962        | <i>Prevotella</i> sp. UBA2732               | Bacteroidetes        | Rumen fluid                                                                              | No         | C:cytoplasm                  |
| CMLMEOMD_03240        | <i>Dysgonomonas</i> sp. UBA7710             | Bacteroidetes        | Anode biofilm                                                                            | Yes        | C:extracellular space        |
| DPODELBJ_00546        | <i>Bacteroidales bacterium</i> UBA1072      | Bacteroidetes        | feces                                                                                    | Yes        | C:extracellular space        |
| IAMDFLOD_01903        | <i>Prevotellaceae bacterium</i> UBA6382     | Bacteroidetes        | feces                                                                                    | Yes        | C:extracellular space        |
| JMEOHLDH_03232        | <i>Dysgonomonas</i> sp. UBA7630             | Bacteroidetes        | metal                                                                                    | Yes        | C:cytoplasm                  |
| MKLBANBO_00069        | <i>Bacteroidales bacterium</i> UBA6871      | Bacteroidetes        | feces                                                                                    | Yes        | C:extracellular space        |
| MLCFPEOF_01278        | <i>Proteiniphilum</i> sp. UBA5492           | Bacteroidetes        | mud                                                                                      | Yes        | C:cytoplasm                  |
| OOAECIKD_00412        | <i>Dysgonomonas</i> sp. UBA7698             | Bacteroidetes        | Anode biofilm                                                                            | Yes        | C:extracellular space        |
| WP_005845227.1        | <i>Prevotella dentalis</i>                  | Bacteroidetes        | human oral microbiota                                                                    | Yes        | C:extracellular space        |
| WP_006800034.1        | <i>Dysgonomonas gadei</i>                   | Bacteroidetes        | human gall bladder                                                                       | Yes        | C:extracellular space        |
| EGN07316.1            | <i>Bacteroides</i> sp. 1_1_30               | Bacteroidetes        | human gastrointestinal tract                                                             | Yes        | C:extracellular space        |
| WP_008998210.1        | MULTISPECIES <i>Bacteroides</i>             | Bacteroidetes        | -                                                                                        | Yes        | C:extracellular space        |
| WP_010264064.1        | <i>Alistipes timonensis</i>                 | Bacteroidetes        | feces                                                                                    | Yes        | C:extracellular space        |
| WP_019538990.1        | <i>Proteiniphilum acetatigenes</i>          | Bacteroidetes        | granule sludge of an upflow anaerobic sludge blanket reactor treating brewery wastewater | No         | C:cytoplasm                  |
| WP_027953066.1        | <i>Hallella seregens</i>                    | Bacteroidetes        | oral microbiota                                                                          | Yes        | C:extracellular space        |
| WP_027953076.1        | <i>Hallella seregens</i>                    | Bacteroidetes        | oral microbiota                                                                          | Yes        | C:extracellular space        |
| WP_032844979.1        | MULTISPECIES <i>Bacteroides</i>             | Bacteroidetes        | -                                                                                        | Yes        | C:extracellular space        |
| AGB28629.1            | <i>Prevotella dentalis</i>                  | Bacteroidetes        | human oral microbiota                                                                    | Yes        | C:extracellular space        |
| CBK67650.1            | <i>Bacteroides xylanisolvens</i>            | Bacteroidetes        | feces                                                                                    | Yes        | C:extracellular space        |
| A0A133Z6P2_9BACT      | <i>Bacteroidales bacterium</i>              | Bacteroidetes        | -                                                                                        | Yes        | C:extracellular space        |
| A0A139T9T0_9FIRM      | <i>Candidatus Stoquefichus</i> sp.          | Firmicutes           | feces                                                                                    | No         | C:cytoplasm                  |
| A0A196S7T3_BLAHN      | <i>Blastocystis</i> sp.                     | Heterokonta          | Alga – intestinal parasite                                                               | No         | C:cytoplasm                  |
| A0A1B1FXF0_9BACT      | <i>Flammeovirga</i> sp.                     | Bacteroidetes        | seawater                                                                                 | Yes        | C:extracellular space        |
| A0A1L7I3D6_9FLAO      | <i>Gramella flava</i>                       | Bacteroidetes        | seawater                                                                                 | Yes        | C:extracellular space        |
| A0A268SQ04_9BACL      | <i>Paenibacillus</i> sp.                    | Firmicutes           | -                                                                                        | Yes        | C:cytoplasm                  |

|                  |                                   |                 |                                                                                     |     |                       |
|------------------|-----------------------------------|-----------------|-------------------------------------------------------------------------------------|-----|-----------------------|
| A0A2T7QBW3_9BACT | <i>Terrimonas</i> sp.             | Bacteroidetes   | -                                                                                   | Yes | C:extracellular space |
| A0A315ZCY6_9BACT | <i>Sedimentomix flava</i>         | Bacteroidetes   | marine sediments                                                                    | Yes | C:extracellular space |
| A0A3A9YU17_9ACTN | <i>Streptomyces hoynatensis</i>   | Actinobacteria  | marine sediments                                                                    | Yes | C:extracellular space |
| A0A3D9VG82_9ACTN | <i>Thermasporomyces composti</i>  | Actinobacteria  | compost                                                                             | No  | C:cytoplasm           |
| A0A3N2LZ60_9BACT | <i>Muribaculaceae bacterium</i>   | Bacteroidetes   | dominant in the mouse gut microbiota and detected in the intestine of other animals | No  | C:cytoplasm           |
| A0A3R6F7M2_9BACT | <i>Parabacteroides</i> sp.        | Bacteroidetes   | feces                                                                               | Yes | C:extracellular space |
| A0A4Q6XZE0_9SPHI | <i>Sphingobacterium</i> sp.       | Bacteroidetes   | -                                                                                   | Yes | C:extracellular space |
| I9S9U4_9BACE     | <i>Bacteroides nordii</i>         | Bacteroidetes   | human Intestinal origin                                                             | Yes | C:extracellular space |
| L1N1N3_9BACT     | <i>Prevotella saccharolytica</i>  | Bacteroidetes   | human oral cavity                                                                   | Yes | C:extracellular space |
| R5BJ25_9BACT     | <i>Alistipes</i> sp.              | Bacteroidetes   | intestinal microbiota                                                               | Yes | C:cytoplasm           |
| W0IZ67_9BACT     | <i>Opitutaceae bacterium</i> TAV5 | Verrucomicrobia | hindgut of the wood-feeding termite Reticulitermes flavipes                         | Yes | C:extracellular space |
| W7Y0J7_9BACT     | <i>Saccharicrinis fermentans</i>  | Bacteroidetes   | marine                                                                              | No  | C:cytoplasm           |

\*SignalP - <https://services.healthtech.dtu.dk/service.php?SignalP-5.0>

\*\*BUSCA - <http://busca.biocomp.unibo.it/>



**Supplementary Table 3: Structural comparison of structurally characterized GH5 and GH30 members, and CapGH173 modelled structure.**

| Gene ID    | Family_Subfamily | Activity                                           | PDB code | Rmsd (Å)* | Identity (%) Coverage (%) |
|------------|------------------|----------------------------------------------------|----------|-----------|---------------------------|
| AEY82463.1 | GH30_8           | glucuronoarabinoxylan-specific endo-β-1,4-xylanase | 4QAW     | 2.06      | NS                        |
| EGD48159.1 | GH30_8           | endo-β-1,4-xylanase                                | 4FMV     | 2.08      | NS                        |
| AAA75477.1 | GH5_1            | endo-β-1,4-glucanase                               | 1VRX     | 2.09      | NS                        |
| AAB53151.1 | GH30_8           | glucuronoarabinoxylan-specific endo-β-1,4-xylanase | 1NOF     | 2.12      | 21% (24%)                 |
| CAA97612.1 | GH30_8           | glucuronoarabinoxylan-specific endo-β-1,4-xylanase | 3GTN     | 2.17      | NS                        |
| AAO78418.1 | GH30_3           | endo-β-1,6-glucanase                               | 5NGK     | 2.75      | 26% (11%)                 |
| AAK76864.1 | GH30_8           | endo-β-1,4-xylanase                                | 5CXP     | 3.23      | NS                        |
| BAK26781.1 | GH5_8            | endo-β-1,4-mannanase                               | 3WSU     | 3.27      | NS                        |
| AND74761.1 | GH5_2            | endo-β-1,4-glucanase                               | 5I2U     | 3.55      | NS                        |
| AEN10237.1 | GH5_8            | endo-β-1,4-mannanase                               | 4FK9     | 4.41      | 26% (20%)                 |
| AAC19169.1 | GH5_2            | endo-β-1,4-glucanase                               | 1A3H     | 4.54      | NS                        |
| AGA35556.1 | GH5_36           | endo-β-1,4-mannanase                               | 3W0K     | 5.49      | NS                        |
| BAB04322.1 | GH5_4            | endo-β-1,4-glucanase                               | 4V2X     | 5.88      | NS                        |

\* Structural alignment was performed using the "super" command in Pymol.

NS: No significant similarity found using Blast search with e-value < 1e-5.

**Supplementary Table 4: Isolation source and predicted cellular localization of the identified proteins containing a CBM89 domain.**

| <b>GeneID</b>         | <b>Organism</b>                                   | <b>Phylum</b>        | <b>Isolation source</b>     | <b>SignalP*</b> | <b>BUSCA**</b>               |
|-----------------------|---------------------------------------------------|----------------------|-----------------------------|-----------------|------------------------------|
| <b>PBMDCECB_09513</b> | <b><i>Bacteroidaceae bacterium</i> MAG57</b>      | <b>Bacteroidetes</b> | <b>Capybara gut</b>         | <b>Yes</b>      | <b>C:extracellular space</b> |
| HCZ20826.1            | <i>Porphyromonadaceae bacterium</i>               | Bacteroidetes        | human gut                   | Yes             | C:extracellular space        |
| CDA22303.1            | <i>Bacteroides</i> sp. CAG:144                    | Bacteroidetes        | Distal human gut microbiota | Yes             | C:extracellular space        |
| WP_091814262.1        | <i>Prevotella</i> sp. BP1-148                     | Bacteroidetes        | rumen microbiome            | Yes             | C:extracellular space        |
| CCZ11597.1            | <i>Prevotella</i> sp. CAG:1092                    | Bacteroidetes        | Distal human gut microbiota | Yes             | C:cytoplasm                  |
| WP_091853656.1        | <i>Prevotella</i> sp. BP1-145                     | Bacteroidetes        | rumen microbiome            | Yes             | C:extracellular space        |
| GAY27065.1            | <i>Prevotella</i> sp. MGM1                        | Bacteroidetes        | mouse gut microbiota        | Yes             | C:extracellular space        |
| WP_104368532.1        | <i>Prevotella</i> sp. MGM1                        | Bacteroidetes        | mouse gut microbiota        | Yes             | C:cytoplasm                  |
| WP_094151039.1        | <i>Prevotellaceae bacterium</i> MN60              | Bacteroidetes        | rumen microbiome            | Yes             | C:extracellular space        |
| PWL60328.1            | <i>Bacteroidales bacterium</i>                    | Bacteroidetes        | human gut                   | Yes             | C:cytoplasm                  |
| WP_072290101.1        | <i>Prevotellaceae bacterium</i> HUN156            | Bacteroidetes        | rumen microbiome            | Yes             | C:extracellular space        |
| WP_135042584.1        | <i>Barnesiella</i> sp. WM24                       | Bacteroidetes        | human gut                   | Yes             | C:cytoplasm                  |
| WP_123618297.1        | <i>Muribaculaceae bacterium</i> Isolate-110 (HZI) | Bacteroidetes        | mouse gut microbiota        | Yes             | C:cytoplasm                  |
| WP_002559052.1        | <i>Bacteroides</i>                                | Bacteroidetes        |                             | Yes             | C:extracellular space        |
| WP_007483726.1        | <i>Bacteroides nordii</i>                         | Bacteroidetes        | human gut                   | Yes             | C:extracellular space        |
| WP_122201010.1        | <i>Bacteroides nordii</i>                         | Bacteroidetes        | human gut                   | Yes             | C:extracellular space        |
| OKZ05215.1            | <i>Bacteroides</i> sp. 41_26                      | Bacteroidetes        | human gut                   | Yes             | C:extracellular space        |
| BIMNJMPD_01612        | <i>Bacteroidales bacterium</i> UBA3663            | Bacteroidetes        | sheep gut                   | Yes             | C:extracellular space        |
| LOCNPFOL_01009        | <i>Porphyromonadaceae bacterium</i> UBA7479       | Bacteroidetes        | Guinea Pig                  | Yes             | C:cytoplasm                  |
| KNGJINAD_01644        | <i>Porphyromonadaceae bacterium</i> UBA7484       | Bacteroidetes        | Guinea Pig                  | Yes             | C:cytoplasm                  |
| NHOEEEMP_00034        | <i>Prevotellaceae bacterium</i> UBA1710           | Bacteroidetes        | elephant feces              | Yes             | C:cytoplasm                  |
| EPNIHMFE_00760        | <i>Prevotellaceae bacterium</i> UBA1716           | Bacteroidetes        | elephant feces              | Yes             | C:cytoplasm                  |
| NGMNMMDAK_01623       | <i>Prevotellaceae bacterium</i> UBA1726           | Bacteroidetes        | elephant feces              | Yes             | C:extracellular space        |
| DEFKBOBF_00387        | <i>Prevotellaceae bacterium</i> UBA2718           | Bacteroidetes        | Rumen fluid                 | Yes             | C:extracellular space        |
| CKHBHCDJ_00495        | <i>Prevotellaceae bacterium</i> UBA2752           | Bacteroidetes        | Rumen fluid                 | Yes             | C:extracellular space        |
| DOAKLKJHJ_01015       | <i>Prevotellaceae bacterium</i> UBA2852           | Bacteroidetes        | Rumen                       | Yes             | C:extracellular space        |
| LJCKNPDI_00845        | <i>Prevotellaceae bacterium</i> UBA2876           | Bacteroidetes        | Rumen                       | No              | C:cytoplasm                  |
| BIPIBPOJ_00907        | <i>Prevotellaceae bacterium</i> UBA3627           | Bacteroidetes        | sheep gut                   | Yes             | C:extracellular space        |
| LDFJJJLA_01083        | <i>Prevotellaceae bacterium</i> UBA3839           | Bacteroidetes        | sheep gut                   | No              | C:cytoplasm                  |
| OELNBKJA_00323        | <i>Prevotellaceae bacterium</i> UBA4256           | Bacteroidetes        | sheep gut                   | No              | C:cytoplasm                  |

|                |                                         |               |           |     |                       |
|----------------|-----------------------------------------|---------------|-----------|-----|-----------------------|
| OGGLENBF_00595 | <i>Prevotellaceae bacterium</i> UBA4261 | Bacteroidetes | sheep gut | Yes | C:extracellular space |
| CDGGANKO_02361 | <i>Prevotellaceae bacterium</i> UBA4361 | Bacteroidetes | sheep gut | Yes | C:extracellular space |
| ALFMGCEP_01992 | <i>Prevotellaceae bacterium</i> UBA4371 | Bacteroidetes | sheep gut | Yes | C:extracellular space |
| FLOJMOOP_00684 | <i>Prevotella</i> sp. UBA2937           | Bacteroidetes | Rumen     | Yes | C:extracellular space |
| MDLLAMAG_01190 | <i>Prevotella</i> sp. UBA3256           | Bacteroidetes | rat gut   | Yes | C:extracellular space |
| LHHCJMON_01197 | <i>Prevotella</i> sp. UBA3313           | Bacteroidetes | rat gut   | Yes | C:extracellular space |
| OBEAGFAE_00968 | <i>Prevotella</i> sp. UBA3675           | Bacteroidetes | sheep gut | Yes | C:extracellular space |
| FIDEOMML_01975 | <i>Prevotella</i> sp. UBA3846           | Bacteroidetes | sheep gut | Yes | C:extracellular space |
| JLDLJPLF_01299 | <i>Prevotella</i> sp. UBA7051           | Bacteroidetes | rat gut   | Yes | C:extracellular space |
| OIMLIDDL_00592 | <i>Prevotella</i> sp. UBA7071           | Bacteroidetes | rat gut   | Yes | C:extracellular space |
| PHAJJDNO_01443 | <i>Prevotella</i> sp. UBA7115           | Bacteroidetes | rat gut   | Yes | C:extracellular space |
| MAHBGBIJ_00134 | <i>Prevotella</i> sp. UBA7140           | Bacteroidetes | rat gut   | Yes | C:extracellular space |
| HALFCFOA_01590 | <i>Prevotella</i> sp. UBA7197           | Bacteroidetes | rat gut   | Yes | C:extracellular space |

---

\*SignalP - <https://services.healthtech.dtu.dk/service.php?SignalP-5.0>

\*\*BUSCA - <http://busca.biocomp.unibo.it/>

**Supplementary Table 5: Substrates tested against the novel Carbohydrate-Active Enzymes (CAZymes) members. Substrates highlighted in red were used for further assays of the isolated CapGH10 N-terminal domain (CBM89).**

| <b>Complex substrates</b>                         | <b>Product code</b> | <b>Company</b> |
|---------------------------------------------------|---------------------|----------------|
| Arabinan (Sugar Beet)                             | P-ARAB              | Megazyme       |
| Arabinogalactan (Larch Wood)                      | P-ARGAL             | Megazyme       |
| Arabinoxylan (Wheat Flour; Low Viscosity ~ 8 cSt) | P-WAXYL             | Megazyme       |
| Avicel® PH-101                                    | 11363               | Sigma          |
| Carboxymethyl(CM)-Cellulose 4M                    | P-CMC4M             | Megazyme       |
| Chitin                                            | GLU410              | ElicityL       |
| Chitosan                                          | 448877              | Sigma          |
| CM-Curdlan                                        | P-CMCUR             | Megazyme       |
| CM-Pachyman                                       | P-CMPAC             | Megazyme       |
| Debranched Arabinan                               | P-DBAR              | Megazyme       |
| Galactan (Potato)                                 | P-GALPOT            | Megazyme       |
| Galactomannan (Carob; Low Viscosity)              | P-GALML             | Megazyme       |
| Galactomannan (Guar; Medium Viscosity)            | P-GGMMV             | Megazyme       |
| Gellan gum                                        | PS113               | Dextra         |
| Glucomannan (Konjac; Low Viscosity)               | P-GLCML             | Megazyme       |
| Glucurono-Arabinoxylan from wheat bran            | XYL101              | Elicityl       |
| Glucurono-XyloMannan from Tremella fuciformis     | HGL200              | Elicityl       |
| Laminarin from Laminaria digitata                 | L9634               | Sigma          |
| Lichenan (Icelandic Moss)                         | P-LICHN             | Megazyme       |
| Mannan (Ivory Nut)                                | P-MANIV             | Megazyme       |
| Pectic Galactan (Potato)                          | P-PGAPT             | Megazyme       |
| Pectin from citrus peel                           | P9135               | Sigma          |
| Polygalacturonic Acid                             | P-PGACT             | Megazyme       |
| Pullulan                                          | P-PULLN             | Megazyme       |
| Rhamnogalacturonan I (Potato)                     | P-RHAM1             | Megazyme       |
| Scleroglucan                                      | YS09784             | Carbosynth     |
| Sodium alginate - low viscosity                   | YS31736             | Carbosynth     |
| Starch from potatoes                              | S5651               | Sigma          |
| Sulfated Arabinogalactan (from Codium f.)         | GAL101              | Elicityl       |
| Wellan                                            | PS121               | Dextra         |
| Xanthan gum from Xanthomonas campestris           | G1253               | Sigma          |
| Xylan from beechwood                              | X4252               | Sigma          |
| Xyloglucan (Tamarind SEED)                        | P-XYGLN             | Megazyme       |
| $\beta$ -Glucan (Oat; Medium Viscosity 11CST)     | P-BGBL              | Megazyme       |

| <b>PNP substrates</b>                       | <b>Product code</b> | <b>Company</b> |
|---------------------------------------------|---------------------|----------------|
| 4-Nitrophenyl $\alpha$ -D-galactopyranoside | N0877               | Sigma          |
| 4-Nitrophenyl $\alpha$ -D-glucopyranoside   | N1377               | Sigma          |
| 4-Nitrophenyl $\alpha$ -D-mannopyranoside   | N2127               | Sigma          |
| 4-Nitrophenyl $\alpha$ -D-xylopyranoside    | N1895               | Sigma          |
| 4-Nitrophenyl $\alpha$ -L-arabinofuranoside | N3641               | Sigma          |
| 4-Nitrophenyl $\alpha$ -L-arabinopyranoside | N3512               | Sigma          |
| 4-Nitrophenyl $\alpha$ -L-fucopyranoside    | N3628               | Sigma          |
| 4-Nitrophenyl $\alpha$ -L-rhamnopyranoside  | N7763               | Sigma          |
| 4-Nitrophenyl $\beta$ -D-cellobioside       | N5759               | Sigma          |
| 4-Nitrophenyl $\beta$ -D-fucopyranoside     | N3378               | Sigma          |

|                                            |              |       |
|--------------------------------------------|--------------|-------|
| 4-Nitrophenyl $\beta$ -D-galactopyranoside | N1252        | Sigma |
| 4-Nitrophenyl $\beta$ -D-glucopyranoside   | N7006        | Sigma |
| 4-Nitrophenyl $\beta$ -D-mannopyranoside   | N1268        | Sigma |
| 4-Nitrophenyl $\beta$ -D-xylopyranoside    | N2132        | Sigma |
| 1-Naphthyl butyrate                        | N8000        | Sigma |
| 1-Naphthyl acetate                         | N8505        | Sigma |
| 4-Nitrophenyl acetate                      | N8130        | Sigma |
| 4-Nitrophenyl trans-ferulate               | COMH93D5FC7C | Sigma |
| 4-Nitrophenyl formate                      | 6554         | Sigma |
| 4-Nitrophenyl myristate                    | 70124        | Sigma |
| 4-Nitrophenyl valerate                     | N4377        | Sigma |
| 4-Nitrophenyl palmitate                    | N2752        | Sigma |
| 4-Nitrophenyl decanoate                    | N0252        | Sigma |

| Oligosaccharides                                             | Product code | Company  |
|--------------------------------------------------------------|--------------|----------|
| Xylotriose                                                   | O-XTR        | Megazyme |
| Xylohexaose                                                  | O-XHE        | Megazyme |
| Xylopentaose                                                 | O-XPE        | Megazyme |
| Xylohexaose                                                  | O-XHE        | Megazyme |
| 2(2)-(4-O-Methyl- $\alpha$ -D-Glucuronyl)-xylobiose - O-UX   | O-UX         | Megazyme |
| 2(3)-(4-O-Methyl- $\alpha$ -D-Glucuronyl)-xylotriose - O-UXX | O-UXX        | Megazyme |
| 2(2)-(4-O-Methyl- $\alpha$ -D-Glucuronyl)-xylotriose - O-XUX | O-XUX        | Megazyme |

| Complex hemicellulosic substrates                            | Product origin |
|--------------------------------------------------------------|----------------|
| Fucosylated xyloglucan and Glucurono-Xylan (from star fruit) | *donated       |
| Fucosylated xyloglucan and Glucurono-Xylan (from Plum)       | *donated       |
| Fucosylated xyloglucan and Xylan (from jambo)                | *donated       |
| Fucosylated xyloglucan and Xylan (from soursop)              | *donated       |
| Glucurono-Xylan (from guavira)                               | *donated       |
| Destarched Corn bran                                         | **donated      |

| Other activity tested                                           | Product code | Company    |
|-----------------------------------------------------------------|--------------|------------|
| Xylan beechwood (Bromophenol blue assay)                        | X4252        | Sigma      |
| Pectin from Citrus peel (Bromophenol blue assay)                | P9135        | Sigma      |
| Destarched Corn bran (Bromophenol blue assay)                   | **donated    |            |
| Rhamnogalacturonan I (potato) (Bromophenol blue assay)          | P-RHAM1      | Megazyme   |
| Glucurono-Arabinoxylan from wheat bran (Bromophenol blue assay) | XYL101       | Elicityl   |
| Heparin sodium salt                                             | YH09354      | Carbosynth |

\*Kindly provided by Prof. Lucimara M. C. Cordeiro from Federal University of Parana.

\*\*Kindly provided by Prof. Anne S. Meyer from Technical University of Denmark.

**Supplementary Table 6: Data collection and refinement statistics of CapCBM89.**

|                              | <b>Native</b>                                  | <b>SeMet derivative</b>                        |
|------------------------------|------------------------------------------------|------------------------------------------------|
| <b>Data collection</b>       |                                                |                                                |
| Wavelength (Å)               | 1.033                                          | 0.978                                          |
| Resolution range (Å)         | 46.38-1.85 (1.92-1.85)                         | 50-2.10 (2.15-2.10)                            |
| Space group                  | P 2 <sub>1</sub> 2 <sub>1</sub> 2 <sub>1</sub> | P 2 <sub>1</sub> 2 <sub>1</sub> 2 <sub>1</sub> |
| Unit cell a, b, c (Å)        | 39.98, 144.51, 169.49                          | 41.80, 143.79, 166.27                          |
| Unique reflections           | 85,143 (8,415)                                 | 111,899 (7,713)                                |
| Multiplicity                 | 8.8 (9.0)                                      | 13.42 (11.26)                                  |
| Completeness (%)             | 99.9 (99.9)                                    | 98.9 (92.7)                                    |
| Mean I/sigma(I)              | 10.37 (0.82)                                   | 9.96 (1.59)                                    |
| R-meas                       | 0.137 (1.919)                                  | 0.218 (1.460)                                  |
| CC <sub>1/2</sub>            | 0.998 (0.483)                                  | 0.997 (0.683)                                  |
| <b>Refinement</b>            |                                                |                                                |
| R-work                       | 0.187 (0.345)                                  |                                                |
| R-free                       | 0.213 (0.338)                                  |                                                |
| Number of non-hydrogen atoms | 6,979                                          |                                                |
| macromolecules               | 6,431                                          |                                                |
| ligands                      | 2                                              |                                                |
| water                        | 546                                            |                                                |
| Protein residues             | 842                                            |                                                |
| RMS (bonds)                  | 0.008                                          |                                                |
| RMS (angles)                 | 1.30                                           |                                                |
| Ramachandran favored (%)     | 97.0                                           |                                                |
| Ramachandran outliers (%)    | 0                                              |                                                |
| Clash score                  | 2.28                                           |                                                |
| Average B-factor             | 47.4                                           |                                                |
| macromolecules               | 47.7                                           |                                                |
| ligands                      | 29                                             |                                                |
| solvent                      | 44.4                                           |                                                |

Statistics for the highest-resolution shell are shown in parentheses.

**Supplementary Table 7: Structural alignment of CapCBM89 domain using PDBeFold Server with other  $\beta$ -helix Carbohydrate-Active Enzymes (CAZymes) families.**

| Family      | Activity                          | PDB code | Q-score | Z-score | RMSD  | Nalgn | SSM Seq (%) |
|-------------|-----------------------------------|----------|---------|---------|-------|-------|-------------|
| <b>GH91</b> |                                   |          |         |         |       |       |             |
|             | fructotransferase                 | 2INU     | 0.152   | 7.878   | 3.184 | 233   | 8.16        |
|             | difuctose anhydride III hydrolase | 5ZKS     | 0.131   | 6.833   | 3.304 | 232   | 10.78       |
| <b>GH28</b> |                                   |          |         |         |       |       |             |
|             | exopolygalacturonase              | 3JUR     | 0.1499  | 5.034   | 3.303 | 249   | 10.44       |
|             | endopolygalacturonase             | 1CZF     | 0.1494  | 5.278   | 3.164 | 211   | 8.53        |
|             | polygalacturonase                 | 1BHE     | 0.1424  | 5.266   | 3.349 | 225   | 9.33        |
|             | endo-xylogalacturonan hydrolase   | 4C2L     | 0.1422  | 4.454   | 3.545 | 231   | 7.79        |
|             | endopolygalacturonase             | 1K5C     | 0.1308  | 2.998   | 3.699 | 215   | 7.44        |
|             | endopolygalacturonase             | 1NHC     | 0.1302  | 0.544   | 4.563 | 247   | 8.09        |
|             | endopolygalacturonase             | 1HG8     | 0.13    | 3.866   | 3.403 | 209   | 9.57        |
|             | polygalacturonase                 | 1IA5     | 0.1268  | 0.884   | 4.459 | 241   | 9.96        |
|             | rhamnogalacturonase               | 1RMG     | 0.124   | 2.985   | 3.06  | 212   | 8.02        |
|             | polygalacturonase                 | 2IQ7     | 0.1231  | 4.009   | 3.831 | 215   | 7.44        |
|             | galacturonidase                   | 5OLP     | 0.1206  | 4.997   | 3.294 | 220   | 10          |
|             | exopolygalacturonase              | 2UVE     | 0.1197  | 5.374   | 3.442 | 257   | 10.12       |
|             | n.d.                              | 4MXN     | 0.1169  | 5.811   | 3.296 | 156   | 13.46       |
| <b>GH49</b> |                                   |          |         |         |       |       |             |
|             | dextranase                        | 1OGM     | 0.07796 | 5.596   | 3.741 | 219   | 5.93        |
|             | isopullulanase                    | 1WMR     | 0.07461 | 1.804   | 3.918 | 216   | 6.02        |
|             | dextranase                        | 6NZS     | 0.06918 | 3.087   | 4.201 | 225   | 6.22        |
| <b>PL1</b>  |                                   |          |         |         |       |       |             |
|             | pectate lyase                     | 2QX3     | 0.125   | 5.787   | 3.272 | 195   | 8.72        |
|             | pectate lyase                     | 3ZSC     | 0.1247  | 5.341   | 3.132 | 190   | 5.79        |
|             | pectate lyase                     | 3VMV     | 0.1238  | 6.159   | 3.104 | 187   | 9.62        |
|             | pectate lyase                     | 2QX3     | 0.1234  | 5.836   | 3.155 | 190   | 8.42        |
|             | n.d.                              | 1PXZ     | 0.1162  | 6.53    | 3.129 | 188   | 4.79        |
|             | pectate lyase                     | 1JRG     | 0.1149  | 7.122   | 3.064 | 187   | 9.09        |



|                          |      |        |       |       |     |       |
|--------------------------|------|--------|-------|-------|-----|-------|
| pectate lyase            | 1BN8 | 0.1126 | 5.909 | 3.016 | 195 | 6.67  |
| pectate lyase            | 1AIR | 0.1103 | 6.202 | 3.299 | 190 | 8.95  |
| pectin lyase             | 1QCX | 0.1102 | 6.275 | 3.082 | 185 | 6.48  |
| pectin lyase             | 1IDK | 0.1093 | 5.366 | 3.009 | 182 | 9.89  |
| pectate lyase            | 5GT5 | 0.1068 | 5.044 | 3.356 | 212 | 8.96  |
| n.d.                     | 6FI2 | 0.1051 | 6.207 | 3.22  | 189 | 8.99  |
| pectate lyase            | 4HWV | 0.0894 | 7.821 | 3.164 | 199 | 8.54  |
| pectate lyase            | 1VBL | 0.0825 | 4.682 | 3.704 | 191 | 4.71  |
| <b>PL3</b>               |      |        |       |       |     |       |
| pectate lyase            | 3T9G | 0.1452 | 3.1   | 2.664 | 146 | 8.9   |
| pectate lyase            | 1EE6 | 0.1266 | 4.963 | 3.248 | 151 | 3.97  |
| pectate lyase            | 3B4N | 0.0863 | 3.941 | 3.347 | 160 | 6.25  |
| pectate lyase            | 4U49 | 0.0824 | 2.335 | 3.362 | 156 | 9.61  |
| <b>PL6</b>               |      |        |       |       |     |       |
| alginate lyase           | 6QPS | 0.1723 | 6.633 | 3.239 | 265 | 7.17  |
| alginate lyase           | 5Z9T | 0.1331 | 7.228 | 3.189 | 244 | 9.83  |
| chondroitinase           | 1DBG | 0.1206 | 7.878 | 3.134 | 226 | 7.08  |
| alginate lyase           | 5GKD | 0.0835 | 6.38  | 3.488 | 245 | 6.53  |
| <b>PL9</b>               |      |        |       |       |     |       |
| pectate lyase            | 1RU4 | 0.1134 | 5.712 | 3.168 | 201 | 5.97  |
| rhamnogalacturonan lyase | 5OLQ | 0.1082 | 4.842 | 4.182 | 239 | 5.86  |
| <b>PL31</b>              |      |        |       |       |     |       |
| alginate lyase           | 6KFN | 0.1544 | 8.122 | 3.156 | 202 | 10.4  |
| <b>CE8</b>               |      |        |       |       |     |       |
| pectin methylesterase    | 3UW0 | 0.1173 | 5.464 | 3.335 | 188 | 6.38  |
| pectin methylesterase    | 2NTQ | 0.1166 | 5.909 | 3.311 | 193 | 6.73  |
| pectin methylesterase    | 1QJV | 0.1153 | 5.579 | 5.579 | 195 | 7.18  |
| pectin methylesterase    | 5C1C | 0.1343 | 5.964 | 3.321 | 194 | 6.18  |
| pectin methylesterase    | 1XG8 | 0.1326 | 6.439 | 3.153 | 193 | 6.73  |
| pectin methylesterase    | 4PMH | 0.1035 | 7.559 | 2.946 | 177 | 7.34  |
| pectin methylesterase    | 1GQ8 | 0.0983 | 4.656 | 3.55  | 178 | 10.11 |
| n.d.                     | 3GRH | 0.0826 | 5.762 | 3.345 | 176 | 9.66  |

---

n.d. - not determined

**Supplementary Table 8: Number of reads generated by each sample from 16S rRNA gene targeting sequencing (16S), Metagenomics (MG) and Metatranscriptomics (MT) analyses.**

| Sample          | Omics | #Raw reads | #QC Reads  | #QC Reads R1 Only | #QC Reads R2 Only | # Reads removed | # Reads QC merged* | % reads mapped to chloroplasts |
|-----------------|-------|------------|------------|-------------------|-------------------|-----------------|--------------------|--------------------------------|
| 16S-Cecum_2-I   | 16S   | 47,848     | 43,123     | 2,353             | 2,105             | 267             | 28,087             | 0.03                           |
| 16S-Cecum_2-II  | 16S   | 65,723     | 61,078     | 2,522             | 1,699             | 424             | 42,931             | 0.06                           |
| 16S-Cecum_2-III | 16S   | 53,557     | 48,888     | 2,642             | 1,618             | 409             | 32,433             | 0.04                           |
| 16S-Recto_2-I   | 16S   | 90,161     | 82,991     | 5,083             | 746               | 1,341           | 63,006             | 0.06                           |
| 16S-Recto_2-II  | 16S   | 99,819     | 91,369     | 6,348             | 730               | 1,372           | 67,843             | 0.06                           |
| 16S-Recto_2-III | 16S   | 78,542     | 69,718     | 6,684             | 759               | 1,381           | 47,522             | 0.02                           |
| 16S-Cecum_3-I   | 16S   | 103,587    | 95,147     | 6,359             | 654               | 1,427           | 73,764             | 0.14                           |
| 16S-Cecum_3-II  | 16S   | 111,108    | 102,293    | 6,798             | 656               | 1,361           | 80,321             | 0.16                           |
| 16S-Cecum_3-III | 16S   | 93,676     | 85,253     | 6,683             | 391               | 1,349           | 66,611             | 0.17                           |
| 16S-Recto_3-I   | 16S   | 102,211    | 90,363     | 9,651             | 558               | 1,639           | 65,006             | 0.18                           |
| 16S-Recto_3-II  | 16S   | 113,035    | 99,931     | 1,042             | 591               | 2,093           | 72,481             | 0.18                           |
| 16S-Recto_3-III | 16S   | 72,901     | 63,332     | 8,131             | 289               | 1,149           | 46,287             | 0.2                            |
| 16S-Cecum_4-I   | 16S   | 89,383     | 82,467     | 4,715             | 917               | 1,284           | 61,881             | 0.06                           |
| 16S-Cecum_4-II  | 16S   | 91,702     | 84,352     | 4,723             | 980               | 1,647           | 63,076             | 0.08                           |
| 16S-Cecum_4-III | 16S   | 93,738     | 85,279     | 6,215             | 799               | 1,445           | 63,872             | 0.07                           |
| 16S-Recto_4-I   | 16S   | 103,836    | 92,944     | 8,426             | 782               | 1,684           | 66,778             | 0.05                           |
| 16S-Recto_4-II  | 16S   | 88,087     | 79,375     | 6,796             | 574               | 1,342           | 58,332             | 0.04                           |
| 16S-Recto_4-III | 16S   | 77,590     | 68,870     | 6,997             | 531               | 1,192           | 48,958             | 0.04                           |
| Cecum_2_L001    | MG    | 16,053,242 | 14,927,239 | 847,953           | 202,286           | 75,764          | -                  | 0.03                           |
| Cecum_2_L002    | MG    | 15,417,083 | 14,244,944 | 912,845           | 181,803           | 77,491          | -                  | 0.03                           |
| Cecum_3_L001    | MG    | 16,002,300 | 14,842,683 | 867,878           | 213,157           | 78,582          | -                  | 0.06                           |
| Cecum_3_L002    | MG    | 15,266,318 | 14,074,977 | 921,775           | 189,921           | 79,645          | -                  | 0.06                           |
| Cecum_4_L001    | MG    | 17,731,418 | 16,244,891 | 1,185,884         | 205,319           | 95,324          | -                  | 0.02                           |
| Cecum_4_L002    | MG    | 17,014,212 | 15,450,579 | 1,286,779         | 179,406           | 97,448          | -                  | 0.02                           |
| Recto_2_L001    | MG    | 15,863,549 | 14,701,371 | 882,912           | 201,025           | 78,241          | -                  | 0.02                           |
| Recto_2_L002    | MG    | 15,231,192 | 14,053,448 | 916,169           | 183,235           | 7,834           | -                  | 0.02                           |
| Recto_3_L001    | MG    | 12,145,213 | 11,548,314 | 383,947           | 172,651           | 40,301          | -                  | 0.1                            |
| Recto_3_L002    | MG    | 11,684,960 | 11,091,083 | 396,796           | 157,517           | 39,564          | -                  | 0.1                            |
| Recto_4_L001    | MG    | 17,010,213 | 15,981,289 | 736,022           | 223,977           | 68,925          | -                  | 0.02                           |
| Recto_4_L002    | MG    | 16,289,092 | 15,263,438 | 756,556           | 201,485           | 67,613          | -                  | 0                              |
| Cecum_2_L001    | MT    | 26,426,626 | 23,307,311 | 1,747,585         | 630,267           | 741,463         | -                  | 0                              |
| Cecum_2_L002    | MT    | 27,179,325 | 23,842,682 | 1,900,827         | 653,389           | 782,427         | -                  | 0                              |
| Cecum_3_L001    | MT    | 22,835,041 | 20,173,224 | 1,430,662         | 657,637           | 573,518         | -                  | 0                              |
| Cecum_3_L002    | MT    | 23,497,019 | 20,672,106 | 1,532,488         | 685,473           | 606,952         | -                  | 0                              |

|              |    |            |            |           |         |         |   |   |
|--------------|----|------------|------------|-----------|---------|---------|---|---|
| Cecum_4_L001 | MT | 21,352,930 | 18,984,884 | 1,378,657 | 474,823 | 514,566 | - | 0 |
| Cecum_4_L002 | MT | 21,851,007 | 19,328,451 | 1,489,788 | 491,985 | 540,783 | - | 0 |
| Recto_2_L001 | MT | 22,501,589 | 19,483,042 | 1,764,248 | 649,591 | 604,708 | - | 0 |
| Recto_2_L002 | MT | 23,186,062 | 19,979,906 | 1,889,135 | 67,451  | 642,511 | - | 0 |
| Recto_3_L001 | MT | 24,402,376 | 21,727,516 | 1,399,893 | 592,323 | 682,644 | - | 0 |
| Recto_3_L002 | MT | 25,093,469 | 22,231,815 | 1,526,303 | 616,138 | 719,213 | - | 0 |
| Recto_4_L001 | MT | 25,535,199 | 22,877,975 | 1,471,999 | 566,444 | 618,781 | - | 0 |
| Recto_4_L002 | MT | 26,240,441 | 23,400,599 | 1,598,569 | 588,771 | 652,502 | - | 0 |

---

\*For 16S data only

**Supplementary Table 9. Summary of sequencing and assembly of reads derived from capybara gut microbiome.**

---

| <b>Summary</b>                        | <b>Capybara co-assembly</b> |
|---------------------------------------|-----------------------------|
| No. of contigs ( $\geq$ 1000 bp)      | 99,893                      |
| Total length (bp)                     | 282,515,049                 |
| Largest contig (bp)                   | 252,739                     |
| GC (%)                                | 44                          |
| N50                                   | 3,451                       |
| L50                                   | 18,207                      |
| No. of predicted protein coding genes | 257,668                     |
| No. of CAZymes protein coding genes   | 7,377                       |
| No. of tRNA                           | 1,968                       |
| No. of tmRNA                          | 70                          |
| No. of rRNA                           | 57                          |
| <br>                                  |                             |
| No. of raw reads MG                   | 185,708,792                 |
| No. of QC reads MG                    | 172,424,256                 |
| Raw data in Gbases                    | 36                          |
| <br>                                  |                             |
| No. of raw reads MT                   | 290,101,084                 |
| No. of QC reads MT                    | 256,009,511                 |
| Raw data in Gbases                    | 58                          |

---

**Supplementary Table 10: Description of Sequence Read Archive (SRA) accession numbers of each sample.**

| <b>Omics</b> | <b>Accession</b> | <b>Sample description</b>                   | <b>Link</b>                                                                                             |
|--------------|------------------|---------------------------------------------|---------------------------------------------------------------------------------------------------------|
| MG           | SRR11852049      | Capybara gut microbiome Cecum MG rep 2      | <a href="https://www.ncbi.nlm.nih.gov/sra/SRR11852049">https://www.ncbi.nlm.nih.gov/sra/SRR11852049</a> |
| MG           | SRR11852057      | Capybara gut microbiome Cecum MG rep 2      | <a href="https://www.ncbi.nlm.nih.gov/sra/SRR11852057">https://www.ncbi.nlm.nih.gov/sra/SRR11852057</a> |
| MG           | SRR11852048      | Capybara gut microbiome Cecum MG rep 3      | <a href="https://www.ncbi.nlm.nih.gov/sra/SRR11852048">https://www.ncbi.nlm.nih.gov/sra/SRR11852048</a> |
| MG           | SRR11852056      | Capybara gut microbiome Cecum MG rep 3      | <a href="https://www.ncbi.nlm.nih.gov/sra/SRR11852056">https://www.ncbi.nlm.nih.gov/sra/SRR11852056</a> |
| MG           | SRR11852047      | Capybara gut microbiome Cecum MG rep 4      | <a href="https://www.ncbi.nlm.nih.gov/sra/SRR11852047">https://www.ncbi.nlm.nih.gov/sra/SRR11852047</a> |
| MG           | SRR11852053      | Capybara gut microbiome Cecum MG rep 4      | <a href="https://www.ncbi.nlm.nih.gov/sra/SRR11852053">https://www.ncbi.nlm.nih.gov/sra/SRR11852053</a> |
| MG           | SRR11852046      | Capybara gut microbiome Rectum MG rep 2     | <a href="https://www.ncbi.nlm.nih.gov/sra/SRR11852046">https://www.ncbi.nlm.nih.gov/sra/SRR11852046</a> |
| MG           | SRR11852052      | Capybara gut microbiome Rectum MG rep 2     | <a href="https://www.ncbi.nlm.nih.gov/sra/SRR11852052">https://www.ncbi.nlm.nih.gov/sra/SRR11852052</a> |
| MG           | SRR11852051      | Capybara gut microbiome Rectum MG rep 3     | <a href="https://www.ncbi.nlm.nih.gov/sra/SRR11852051">https://www.ncbi.nlm.nih.gov/sra/SRR11852051</a> |
| MG           | SRR11852055      | Capybara gut microbiome Rectum MG rep 3     | <a href="https://www.ncbi.nlm.nih.gov/sra/SRR11852055">https://www.ncbi.nlm.nih.gov/sra/SRR11852055</a> |
| MG           | SRR11852050      | Capybara gut microbiome Rectum MG rep 4     | <a href="https://www.ncbi.nlm.nih.gov/sra/SRR11852050">https://www.ncbi.nlm.nih.gov/sra/SRR11852050</a> |
| MG           | SRR11852054      | Capybara gut microbiome Rectum MG rep 4     | <a href="https://www.ncbi.nlm.nih.gov/sra/SRR11852054">https://www.ncbi.nlm.nih.gov/sra/SRR11852054</a> |
| MT           | SRR11852100      | Capybara gut microbiome Cecum MT rep 2      | <a href="https://www.ncbi.nlm.nih.gov/sra/SRR11852100">https://www.ncbi.nlm.nih.gov/sra/SRR11852100</a> |
| MT           | SRR11852104      | Capybara gut microbiome Cecum MT rep 2      | <a href="https://www.ncbi.nlm.nih.gov/sra/SRR11852104">https://www.ncbi.nlm.nih.gov/sra/SRR11852104</a> |
| MT           | SRR11852099      | Capybara gut microbiome Cecum MT rep 3      | <a href="https://www.ncbi.nlm.nih.gov/sra/SRR11852099">https://www.ncbi.nlm.nih.gov/sra/SRR11852099</a> |
| MT           | SRR11852103      | Capybara gut microbiome Cecum MT rep 3      | <a href="https://www.ncbi.nlm.nih.gov/sra/SRR11852103">https://www.ncbi.nlm.nih.gov/sra/SRR11852103</a> |
| MT           | SRR11852102      | Capybara gut microbiome Cecum MT rep 4      | <a href="https://www.ncbi.nlm.nih.gov/sra/SRR11852102">https://www.ncbi.nlm.nih.gov/sra/SRR11852102</a> |
| MT           | SRR11852108      | Capybara gut microbiome Cecum MT rep 4      | <a href="https://www.ncbi.nlm.nih.gov/sra/SRR11852108">https://www.ncbi.nlm.nih.gov/sra/SRR11852108</a> |
| MT           | SRR11852101      | Capybara gut microbiome Rectum MT rep 2     | <a href="https://www.ncbi.nlm.nih.gov/sra/SRR11852101">https://www.ncbi.nlm.nih.gov/sra/SRR11852101</a> |
| MT           | SRR11852107      | Capybara gut microbiome Rectum MT rep 2     | <a href="https://www.ncbi.nlm.nih.gov/sra/SRR11852107">https://www.ncbi.nlm.nih.gov/sra/SRR11852107</a> |
| MT           | SRR11852098      | Capybara gut microbiome Rectum MT rep 3     | <a href="https://www.ncbi.nlm.nih.gov/sra/SRR11852098">https://www.ncbi.nlm.nih.gov/sra/SRR11852098</a> |
| MT           | SRR11852106      | Capybara gut microbiome Rectum MT rep 3     | <a href="https://www.ncbi.nlm.nih.gov/sra/SRR11852106">https://www.ncbi.nlm.nih.gov/sra/SRR11852106</a> |
| MT           | SRR11852097      | Capybara gut microbiome Rectum MT rep 4     | <a href="https://www.ncbi.nlm.nih.gov/sra/SRR11852097">https://www.ncbi.nlm.nih.gov/sra/SRR11852097</a> |
| MT           | SRR11852105      | Capybara gut microbiome Rectum MT rep 4     | <a href="https://www.ncbi.nlm.nih.gov/sra/SRR11852105">https://www.ncbi.nlm.nih.gov/sra/SRR11852105</a> |
| 16S          | SRR11852076      | Capybara gut microbiome Cecum 16S rep 2 I   | <a href="https://www.ncbi.nlm.nih.gov/sra/SRR11852076">https://www.ncbi.nlm.nih.gov/sra/SRR11852076</a> |
| 16S          | SRR11852085      | Capybara gut microbiome Cecum 16S rep 2 II  | <a href="https://www.ncbi.nlm.nih.gov/sra/SRR11852085">https://www.ncbi.nlm.nih.gov/sra/SRR11852085</a> |
| 16S          | SRR11852086      | Capybara gut microbiome Cecum 16S rep 2 III | <a href="https://www.ncbi.nlm.nih.gov/sra/SRR11852086">https://www.ncbi.nlm.nih.gov/sra/SRR11852086</a> |
| 16S          | SRR11852070      | Capybara gut microbiome Cecum 16S rep 3 I   | <a href="https://www.ncbi.nlm.nih.gov/sra/SRR11852070">https://www.ncbi.nlm.nih.gov/sra/SRR11852070</a> |
| 16S          | SRR11852071      | Capybara gut microbiome Cecum 16S rep 3 II  | <a href="https://www.ncbi.nlm.nih.gov/sra/SRR11852071">https://www.ncbi.nlm.nih.gov/sra/SRR11852071</a> |
| 16S          | SRR11852072      | Capybara gut microbiome Cecum 16S rep 3 III | <a href="https://www.ncbi.nlm.nih.gov/sra/SRR11852072">https://www.ncbi.nlm.nih.gov/sra/SRR11852072</a> |
| 16S          | SRR11852073      | Capybara gut microbiome Cecum 16S rep 4 I   | <a href="https://www.ncbi.nlm.nih.gov/sra/SRR11852073">https://www.ncbi.nlm.nih.gov/sra/SRR11852073</a> |

|     |             |                                              |                                                                                                         |
|-----|-------------|----------------------------------------------|---------------------------------------------------------------------------------------------------------|
| 16S | SRR11852074 | Capybara gut microbiome Cecum 16S rep 4 II   | <a href="https://www.ncbi.nlm.nih.gov/sra/SRR11852074">https://www.ncbi.nlm.nih.gov/sra/SRR11852074</a> |
| 16S | SRR11852075 | Capybara gut microbiome Cecum 16S rep 4 III  | <a href="https://www.ncbi.nlm.nih.gov/sra/SRR11852075">https://www.ncbi.nlm.nih.gov/sra/SRR11852075</a> |
| 16S | SRR11852069 | Capybara gut microbiome Rectum 16S rep 2 I   | <a href="https://www.ncbi.nlm.nih.gov/sra/SRR11852069">https://www.ncbi.nlm.nih.gov/sra/SRR11852069</a> |
| 16S | SRR11852083 | Capybara gut microbiome Rectum 16S rep 2 II  | <a href="https://www.ncbi.nlm.nih.gov/sra/SRR11852083">https://www.ncbi.nlm.nih.gov/sra/SRR11852083</a> |
| 16S | SRR11852084 | Capybara gut microbiome Rectum 16S rep 2 III | <a href="https://www.ncbi.nlm.nih.gov/sra/SRR11852084">https://www.ncbi.nlm.nih.gov/sra/SRR11852084</a> |
| 16S | SRR11852077 | Capybara gut microbiome Rectum 16S rep 3 I   | <a href="https://www.ncbi.nlm.nih.gov/sra/SRR11852077">https://www.ncbi.nlm.nih.gov/sra/SRR11852077</a> |
| 16S | SRR11852078 | Capybara gut microbiome Rectum 16S rep 3 II  | <a href="https://www.ncbi.nlm.nih.gov/sra/SRR11852078">https://www.ncbi.nlm.nih.gov/sra/SRR11852078</a> |
| 16S | SRR11852079 | Capybara gut microbiome Rectum 16S rep 3 III | <a href="https://www.ncbi.nlm.nih.gov/sra/SRR11852079">https://www.ncbi.nlm.nih.gov/sra/SRR11852079</a> |
| 16S | SRR11852080 | Capybara gut microbiome Rectum 16S rep 4 I   | <a href="https://www.ncbi.nlm.nih.gov/sra/SRR11852080">https://www.ncbi.nlm.nih.gov/sra/SRR11852080</a> |
| 16S | SRR11852081 | Capybara gut microbiome Rectum 16S rep 4 II  | <a href="https://www.ncbi.nlm.nih.gov/sra/SRR11852081">https://www.ncbi.nlm.nih.gov/sra/SRR11852081</a> |
| 16S | SRR11852082 | Capybara gut microbiome Rectum 16S rep 4 III | <a href="https://www.ncbi.nlm.nih.gov/sra/SRR11852082">https://www.ncbi.nlm.nih.gov/sra/SRR11852082</a> |

---

**Supplementary Table 11: Metagenome-assembled genomes (MAGs) NCBI accession numbers.**

| <b>ID</b>    | <b>Biosample ID</b> | <b>GenomeID</b> | <b>Link</b>                                                                                                                               |
|--------------|---------------------|-----------------|-------------------------------------------------------------------------------------------------------------------------------------------|
| <b>MAG1</b>  | SAMN15049459        | JABUSA000000000 | <a href="https://www.ncbi.nlm.nih.gov/search/all/?term=JABUSA000000000">https://www.ncbi.nlm.nih.gov/search/all/?term=JABUSA000000000</a> |
| <b>MAG2</b>  | SAMN15049460        | JABUSB000000000 | <a href="https://www.ncbi.nlm.nih.gov/search/all/?term=JABUSB000000000">https://www.ncbi.nlm.nih.gov/search/all/?term=JABUSB000000000</a> |
| <b>MAG3</b>  | SAMN15049461        | JABUSC000000000 | <a href="https://www.ncbi.nlm.nih.gov/search/all/?term=JABUSC000000000">https://www.ncbi.nlm.nih.gov/search/all/?term=JABUSC000000000</a> |
| <b>MAG4</b>  | SAMN15049462        | JABUSD000000000 | <a href="https://www.ncbi.nlm.nih.gov/search/all/?term=JABUSD000000000">https://www.ncbi.nlm.nih.gov/search/all/?term=JABUSD000000000</a> |
| <b>MAG5</b>  | SAMN15049463        | JABUSE000000000 | <a href="https://www.ncbi.nlm.nih.gov/search/all/?term=JABUSE000000000">https://www.ncbi.nlm.nih.gov/search/all/?term=JABUSE000000000</a> |
| <b>MAG6</b>  | SAMN15049464        | JABUSF000000000 | <a href="https://www.ncbi.nlm.nih.gov/search/all/?term=JABUSF000000000">https://www.ncbi.nlm.nih.gov/search/all/?term=JABUSF000000000</a> |
| <b>MAG7</b>  | SAMN15049465        | JABUSG000000000 | <a href="https://www.ncbi.nlm.nih.gov/search/all/?term=JABUSG000000000">https://www.ncbi.nlm.nih.gov/search/all/?term=JABUSG000000000</a> |
| <b>MAG8</b>  | SAMN15049466        | JABUSH000000000 | <a href="https://www.ncbi.nlm.nih.gov/search/all/?term=JABUSH000000000">https://www.ncbi.nlm.nih.gov/search/all/?term=JABUSH000000000</a> |
| <b>MAG9</b>  | SAMN15049467        | JABUSI000000000 | <a href="https://www.ncbi.nlm.nih.gov/search/all/?term=JABUSI000000000">https://www.ncbi.nlm.nih.gov/search/all/?term=JABUSI000000000</a> |
| <b>MAG10</b> | SAMN15049468        | JABUSJ000000000 | <a href="https://www.ncbi.nlm.nih.gov/search/all/?term=JABUSJ000000000">https://www.ncbi.nlm.nih.gov/search/all/?term=JABUSJ000000000</a> |
| <b>MAG11</b> | SAMN15049469        | JABUSK000000000 | <a href="https://www.ncbi.nlm.nih.gov/search/all/?term=JABUSK000000000">https://www.ncbi.nlm.nih.gov/search/all/?term=JABUSK000000000</a> |
| <b>MAG12</b> | SAMN15049470        | JABUSL000000000 | <a href="https://www.ncbi.nlm.nih.gov/search/all/?term=JABUSL000000000">https://www.ncbi.nlm.nih.gov/search/all/?term=JABUSL000000000</a> |
| <b>MAG13</b> | SAMN15049471        | JABUSM000000000 | <a href="https://www.ncbi.nlm.nih.gov/search/all/?term=JABUSM000000000">https://www.ncbi.nlm.nih.gov/search/all/?term=JABUSM000000000</a> |
| <b>MAG14</b> | SAMN15049472        | JABUSN000000000 | <a href="https://www.ncbi.nlm.nih.gov/search/all/?term=JABUSN000000000">https://www.ncbi.nlm.nih.gov/search/all/?term=JABUSN000000000</a> |
| <b>MAG15</b> | SAMN15049473        | JABUSO00000000  | <a href="https://www.ncbi.nlm.nih.gov/search/all/?term=JABUSO00000000">https://www.ncbi.nlm.nih.gov/search/all/?term=JABUSO00000000</a>   |
| <b>MAG16</b> | SAMN15049474        | JABUSP000000000 | <a href="https://www.ncbi.nlm.nih.gov/search/all/?term=JABUSP000000000">https://www.ncbi.nlm.nih.gov/search/all/?term=JABUSP000000000</a> |
| <b>MAG17</b> | SAMN15049475        | JABUSQ000000000 | <a href="https://www.ncbi.nlm.nih.gov/search/all/?term=JABUSQ000000000">https://www.ncbi.nlm.nih.gov/search/all/?term=JABUSQ000000000</a> |
| <b>MAG18</b> | SAMN15049476        | JABUSR000000000 | <a href="https://www.ncbi.nlm.nih.gov/search/all/?term=JABUSR000000000">https://www.ncbi.nlm.nih.gov/search/all/?term=JABUSR000000000</a> |
| <b>MAG19</b> | SAMN15049477        | JABUSS000000000 | <a href="https://www.ncbi.nlm.nih.gov/search/all/?term=JABUSS000000000">https://www.ncbi.nlm.nih.gov/search/all/?term=JABUSS000000000</a> |
| <b>MAG20</b> | SAMN15049478        | JABUST000000000 | <a href="https://www.ncbi.nlm.nih.gov/search/all/?term=JABUST000000000">https://www.ncbi.nlm.nih.gov/search/all/?term=JABUST000000000</a> |
| <b>MAG21</b> | SAMN15049479        | JABUSU000000000 | <a href="https://www.ncbi.nlm.nih.gov/search/all/?term=JABUSU000000000">https://www.ncbi.nlm.nih.gov/search/all/?term=JABUSU000000000</a> |
| <b>MAG22</b> | SAMN15049480        | JABUSV000000000 | <a href="https://www.ncbi.nlm.nih.gov/search/all/?term=JABUSV000000000">https://www.ncbi.nlm.nih.gov/search/all/?term=JABUSV000000000</a> |
| <b>MAG23</b> | SAMN15049481        | JABUSW000000000 | <a href="https://www.ncbi.nlm.nih.gov/search/all/?term=JABUSW000000000">https://www.ncbi.nlm.nih.gov/search/all/?term=JABUSW000000000</a> |
| <b>MAG24</b> | SAMN15049482        | JABUSX000000000 | <a href="https://www.ncbi.nlm.nih.gov/search/all/?term=JABUSX000000000">https://www.ncbi.nlm.nih.gov/search/all/?term=JABUSX000000000</a> |
| <b>MAG25</b> | SAMN15049483        | JABUSY000000000 | <a href="https://www.ncbi.nlm.nih.gov/search/all/?term=JABUSY000000000">https://www.ncbi.nlm.nih.gov/search/all/?term=JABUSY000000000</a> |
| <b>MAG26</b> | SAMN15049484        | JABUSZ000000000 | <a href="https://www.ncbi.nlm.nih.gov/search/all/?term=JABUSZ000000000">https://www.ncbi.nlm.nih.gov/search/all/?term=JABUSZ000000000</a> |
| <b>MAG27</b> | SAMN15049485        | JABUTA000000000 | <a href="https://www.ncbi.nlm.nih.gov/search/all/?term=JABUTA000000000">https://www.ncbi.nlm.nih.gov/search/all/?term=JABUTA000000000</a> |
| <b>MAG28</b> | SAMN15049486        | JABUTB000000000 | <a href="https://www.ncbi.nlm.nih.gov/search/all/?term=JABUTB000000000">https://www.ncbi.nlm.nih.gov/search/all/?term=JABUTB000000000</a> |
| <b>MAG29</b> | SAMN15049487        | JABUTC000000000 | <a href="https://www.ncbi.nlm.nih.gov/search/all/?term=JABUTC000000000">https://www.ncbi.nlm.nih.gov/search/all/?term=JABUTC000000000</a> |
| <b>MAG30</b> | SAMN15049488        | JABUTD000000000 | <a href="https://www.ncbi.nlm.nih.gov/search/all/?term=JABUTD000000000">https://www.ncbi.nlm.nih.gov/search/all/?term=JABUTD000000000</a> |
| <b>MAG31</b> | SAMN15049489        | JABUTE000000000 | <a href="https://www.ncbi.nlm.nih.gov/search/all/?term=JABUTE000000000">https://www.ncbi.nlm.nih.gov/search/all/?term=JABUTE000000000</a> |
| <b>MAG32</b> | SAMN15049490        | JABUTF000000000 | <a href="https://www.ncbi.nlm.nih.gov/search/all/?term=JABUTF000000000">https://www.ncbi.nlm.nih.gov/search/all/?term=JABUTF000000000</a> |
| <b>MAG33</b> | SAMN15049491        | JABUTG000000000 | <a href="https://www.ncbi.nlm.nih.gov/search/all/?term=JABUTG000000000">https://www.ncbi.nlm.nih.gov/search/all/?term=JABUTG000000000</a> |

|              |              |                 |                                                                                                                                           |
|--------------|--------------|-----------------|-------------------------------------------------------------------------------------------------------------------------------------------|
| <b>MAG34</b> | SAMN15049492 | JABUTH000000000 | <a href="https://www.ncbi.nlm.nih.gov/search/all/?term=JABUTH000000000">https://www.ncbi.nlm.nih.gov/search/all/?term=JABUTH000000000</a> |
| <b>MAG35</b> | SAMN15049493 | JABUTI000000000 | <a href="https://www.ncbi.nlm.nih.gov/search/all/?term=JABUTI000000000">https://www.ncbi.nlm.nih.gov/search/all/?term=JABUTI000000000</a> |
| <b>MAG36</b> | SAMN15049494 | JABUTJ000000000 | <a href="https://www.ncbi.nlm.nih.gov/search/all/?term=JABUTJ000000000">https://www.ncbi.nlm.nih.gov/search/all/?term=JABUTJ000000000</a> |
| <b>MAG37</b> | SAMN15049495 | JABUTK000000000 | <a href="https://www.ncbi.nlm.nih.gov/search/all/?term=JABUTK000000000">https://www.ncbi.nlm.nih.gov/search/all/?term=JABUTK000000000</a> |
| <b>MAG38</b> | SAMN15049496 | JABUTL000000000 | <a href="https://www.ncbi.nlm.nih.gov/search/all/?term=JABUTL000000000">https://www.ncbi.nlm.nih.gov/search/all/?term=JABUTL000000000</a> |
| <b>MAG39</b> | SAMN15049497 | JABUTM000000000 | <a href="https://www.ncbi.nlm.nih.gov/search/all/?term=JABUTM000000000">https://www.ncbi.nlm.nih.gov/search/all/?term=JABUTM000000000</a> |
| <b>MAG40</b> | SAMN15049498 | JABUTN000000000 | <a href="https://www.ncbi.nlm.nih.gov/search/all/?term=JABUTN000000000">https://www.ncbi.nlm.nih.gov/search/all/?term=JABUTN000000000</a> |
| <b>MAG41</b> | SAMN15049499 | JABUTO000000000 | <a href="https://www.ncbi.nlm.nih.gov/search/all/?term=JABUTO000000000">https://www.ncbi.nlm.nih.gov/search/all/?term=JABUTO000000000</a> |
| <b>MAG42</b> | SAMN15049500 | JABUTP000000000 | <a href="https://www.ncbi.nlm.nih.gov/search/all/?term=JABUTP000000000">https://www.ncbi.nlm.nih.gov/search/all/?term=JABUTP000000000</a> |
| <b>MAG43</b> | SAMN15049501 | JABUTQ000000000 | <a href="https://www.ncbi.nlm.nih.gov/search/all/?term=JABUTQ000000000">https://www.ncbi.nlm.nih.gov/search/all/?term=JABUTQ000000000</a> |
| <b>MAG44</b> | SAMN15049502 | JABUTR000000000 | <a href="https://www.ncbi.nlm.nih.gov/search/all/?term=JABUTR000000000">https://www.ncbi.nlm.nih.gov/search/all/?term=JABUTR000000000</a> |
| <b>MAG45</b> | SAMN15049503 | JABUTS000000000 | <a href="https://www.ncbi.nlm.nih.gov/search/all/?term=JABUTS000000000">https://www.ncbi.nlm.nih.gov/search/all/?term=JABUTS000000000</a> |
| <b>MAG46</b> | SAMN15049504 | JABUTT000000000 | <a href="https://www.ncbi.nlm.nih.gov/search/all/?term=JABUTT000000000">https://www.ncbi.nlm.nih.gov/search/all/?term=JABUTT000000000</a> |
| <b>MAG47</b> | SAMN15049505 | JABUTU000000000 | <a href="https://www.ncbi.nlm.nih.gov/search/all/?term=JABUTU000000000">https://www.ncbi.nlm.nih.gov/search/all/?term=JABUTU000000000</a> |
| <b>MAG48</b> | SAMN15049506 | JABUTV000000000 | <a href="https://www.ncbi.nlm.nih.gov/search/all/?term=JABUTV000000000">https://www.ncbi.nlm.nih.gov/search/all/?term=JABUTV000000000</a> |
| <b>MAG49</b> | SAMN15049507 | JABUTW000000000 | <a href="https://www.ncbi.nlm.nih.gov/search/all/?term=JABUTW000000000">https://www.ncbi.nlm.nih.gov/search/all/?term=JABUTW000000000</a> |
| <b>MAG50</b> | SAMN15049508 | JABUTX000000000 | <a href="https://www.ncbi.nlm.nih.gov/search/all/?term=JABUTX000000000">https://www.ncbi.nlm.nih.gov/search/all/?term=JABUTX000000000</a> |
| <b>MAG51</b> | SAMN15049509 | JABUTY000000000 | <a href="https://www.ncbi.nlm.nih.gov/search/all/?term=JABUTY000000000">https://www.ncbi.nlm.nih.gov/search/all/?term=JABUTY000000000</a> |
| <b>MAG52</b> | SAMN15049510 | JABUTZ000000000 | <a href="https://www.ncbi.nlm.nih.gov/search/all/?term=JABUTZ000000000">https://www.ncbi.nlm.nih.gov/search/all/?term=JABUTZ000000000</a> |
| <b>MAG53</b> | SAMN15049511 | JABUUA000000000 | <a href="https://www.ncbi.nlm.nih.gov/search/all/?term=JABUUA000000000">https://www.ncbi.nlm.nih.gov/search/all/?term=JABUUA000000000</a> |
| <b>MAG54</b> | SAMN15049512 | JABUUB000000000 | <a href="https://www.ncbi.nlm.nih.gov/search/all/?term=JABUUB000000000">https://www.ncbi.nlm.nih.gov/search/all/?term=JABUUB000000000</a> |
| <b>MAG55</b> | SAMN15049513 | JABUUC000000000 | <a href="https://www.ncbi.nlm.nih.gov/search/all/?term=JABUUC000000000">https://www.ncbi.nlm.nih.gov/search/all/?term=JABUUC000000000</a> |
| <b>MAG56</b> | SAMN15049514 | JABUUD000000000 | <a href="https://www.ncbi.nlm.nih.gov/search/all/?term=JABUUD000000000">https://www.ncbi.nlm.nih.gov/search/all/?term=JABUUD000000000</a> |
| <b>MAG57</b> | SAMN15049515 | JABUUE000000000 | <a href="https://www.ncbi.nlm.nih.gov/search/all/?term=JABUUE000000000">https://www.ncbi.nlm.nih.gov/search/all/?term=JABUUE000000000</a> |
| <b>MAG58</b> | SAMN15049516 | JABUUF000000000 | <a href="https://www.ncbi.nlm.nih.gov/search/all/?term=JABUUF000000000">https://www.ncbi.nlm.nih.gov/search/all/?term=JABUUF000000000</a> |
| <b>MAG59</b> | SAMN15049517 | JABUUG000000000 | <a href="https://www.ncbi.nlm.nih.gov/search/all/?term=JABUUG000000000">https://www.ncbi.nlm.nih.gov/search/all/?term=JABUUG000000000</a> |
| <b>MAG60</b> | SAMN15049518 | JABUUH000000000 | <a href="https://www.ncbi.nlm.nih.gov/search/all/?term=JABUUH000000000">https://www.ncbi.nlm.nih.gov/search/all/?term=JABUUH000000000</a> |
| <b>MAG61</b> | SAMN15049519 | JABUUI000000000 | <a href="https://www.ncbi.nlm.nih.gov/search/all/?term=JABUUI000000000">https://www.ncbi.nlm.nih.gov/search/all/?term=JABUUI000000000</a> |
| <b>MAG62</b> | SAMN15049520 | JABUUI000000000 | <a href="https://www.ncbi.nlm.nih.gov/search/all/?term=JABUUI000000000">https://www.ncbi.nlm.nih.gov/search/all/?term=JABUUI000000000</a> |
| <b>MAG63</b> | SAMN15049521 | JABUUK000000000 | <a href="https://www.ncbi.nlm.nih.gov/search/all/?term=JABUUK000000000">https://www.ncbi.nlm.nih.gov/search/all/?term=JABUUK000000000</a> |
| <b>MAG64</b> | SAMN15049522 | JABUUL000000000 | <a href="https://www.ncbi.nlm.nih.gov/search/all/?term=JABUUL000000000">https://www.ncbi.nlm.nih.gov/search/all/?term=JABUUL000000000</a> |
| <b>MAG65</b> | SAMN15049523 | JABUUM000000000 | <a href="https://www.ncbi.nlm.nih.gov/search/all/?term=JABUUM000000000">https://www.ncbi.nlm.nih.gov/search/all/?term=JABUUM000000000</a> |
| <b>MAG66</b> | SAMN15049524 | JABUUN000000000 | <a href="https://www.ncbi.nlm.nih.gov/search/all/?term=JABUUN000000000">https://www.ncbi.nlm.nih.gov/search/all/?term=JABUUN000000000</a> |
| <b>MAG67</b> | SAMN15049525 | JABUOO000000000 | <a href="https://www.ncbi.nlm.nih.gov/search/all/?term=JABUOO000000000">https://www.ncbi.nlm.nih.gov/search/all/?term=JABUOO000000000</a> |
| <b>MAG68</b> | SAMN15049526 | JABUUP000000000 | <a href="https://www.ncbi.nlm.nih.gov/search/all/?term=JABUUP000000000">https://www.ncbi.nlm.nih.gov/search/all/?term=JABUUP000000000</a> |
| <b>MAG69</b> | SAMN15049527 | JABUQQ000000000 | <a href="https://www.ncbi.nlm.nih.gov/search/all/?term=JABUQQ000000000">https://www.ncbi.nlm.nih.gov/search/all/?term=JABUQQ000000000</a> |



|              |              |                  |                                                                                                                                             |
|--------------|--------------|------------------|---------------------------------------------------------------------------------------------------------------------------------------------|
| <b>MAG70</b> | SAMN15049528 | JABUUR000000000  | <a href="https://www.ncbi.nlm.nih.gov/search/all/?term=JABUUR000000000">https://www.ncbi.nlm.nih.gov/search/all/?term=JABUUR000000000</a>   |
| <b>MAG71</b> | SAMN15049529 | JABUUS000000000  | <a href="https://www.ncbi.nlm.nih.gov/search/all/?term=JABUUS000000000">https://www.ncbi.nlm.nih.gov/search/all/?term=JABUUS000000000</a>   |
| <b>MAG72</b> | SAMN15049530 | JABUUT000000000  | <a href="https://www.ncbi.nlm.nih.gov/search/all/?term=JABUUT000000000">https://www.ncbi.nlm.nih.gov/search/all/?term=JABUUT000000000</a>   |
| <b>MAG73</b> | SAMN15049531 | JABUUU000000000  | <a href="https://www.ncbi.nlm.nih.gov/search/all/?term=JABUUU000000000">https://www.ncbi.nlm.nih.gov/search/all/?term=JABUUU000000000</a>   |
| <b>MAG74</b> | SAMN15049532 | JABUUV000000000  | <a href="https://www.ncbi.nlm.nih.gov/search/all/?term=JABUUV000000000">https://www.ncbi.nlm.nih.gov/search/all/?term=JABUUV000000000</a>   |
| <b>MAG75</b> | SAMN15049533 | JABU UW000000000 | <a href="https://www.ncbi.nlm.nih.gov/search/all/?term=JABU UW000000000">https://www.ncbi.nlm.nih.gov/search/all/?term=JABU UW000000000</a> |
| <b>MAG76</b> | SAMN15049534 | JABUUX000000000  | <a href="https://www.ncbi.nlm.nih.gov/search/all/?term=JABUUX000000000">https://www.ncbi.nlm.nih.gov/search/all/?term=JABUUX000000000</a>   |
| <b>MAG77</b> | SAMN15049535 | JABUUY000000000  | <a href="https://www.ncbi.nlm.nih.gov/search/all/?term=JABUUY000000000">https://www.ncbi.nlm.nih.gov/search/all/?term=JABUUY000000000</a>   |
| <b>MAG78</b> | SAMN15049536 | JABUUZ000000000  | <a href="https://www.ncbi.nlm.nih.gov/search/all/?term=JABUUZ000000000">https://www.ncbi.nlm.nih.gov/search/all/?term=JABUUZ000000000</a>   |
| <b>MAG79</b> | SAMN15049537 | JABUVA000000000  | <a href="https://www.ncbi.nlm.nih.gov/search/all/?term=JABUVA000000000">https://www.ncbi.nlm.nih.gov/search/all/?term=JABUVA000000000</a>   |

---

## Supplementary References

1. Parks, D. H. *et al.* Recovery of nearly 8,000 metagenome-assembled genomes substantially expands the tree of life. *Nat. Microbiol.* **2**, 1533–1542 (2017).
2. Na, S.-I. I. *et al.* UBCG: Up-to-date bacterial core gene set and pipeline for phylogenomic tree reconstruction. *J. Microbiol.* **56**, (2018).
3. Baek, M. *et al.* Accurate prediction of protein structures and interactions using a three-track neural network. *Science* **373**, 871–876 (2021).
4. Laskowski, R. A., Jabłońska, J., Pravda, L., Vařeková, R. S. & Thornton, J. M. PDBsum: structural summaries of PDB entries. *Protein Sci.* **27**, 129–134 (2018).
5. Kumagai, Y. *et al.* The loop structure of Actinomycete glycoside hydrolase family 5 mannanases governs substrate recognition. *FEBS J.* **282**, 4001–4014 (2015).
6. Takasuka, T. E. *et al.* Biochemical properties and atomic resolution structure of a proteolytically processed  $\beta$ -mannanase from cellulolytic *Streptomyces* sp. SirexAA-E. *PLoS One* **9**, e94166 (2014).
7. St John, F. J. *et al.* A novel member of glycoside hydrolase family 30 subfamily 8 with altered substrate specificity. *urn:issn:1399-0047* **70**, 2950–2958 (2014).
8. Larson, S. B., Day, J., De la Rosa, A. P. B., Keen, N. T. & McPherson, A. First crystallographic structure of a xylanase from glycoside hydrolase family 5: implications for catalysis. *Biochemistry* **42**, 8411–8422 (2003).
9. Gabler, F. *et al.* Protein sequence analysis using the MPI bioinformatics toolkit. *Curr. Protoc. Bioinforma.* **72**, e108 (2020).
10. Robert, X. & Gouet, P. Deciphering key features in protein structures with the new ENDscript server. *Nucleic Acids Res.* **42**, W320–W324 (2014).
11. Svergun, D. I. Determination of the regularization parameter in indirect-transform methods using perceptual criteria. *J. Appl. Crystallogr.* **25**, 495–503 (1992).
12. Pijning, T., van Pouderooyen, G., Kluskens, L., van der Oost, J. & Dijkstra, B. W. The crystal structure of a hyperthermoactive exopolysaccharidase from *Thermotoga maritima* reveals a unique tetramer. *FEBS Lett.* **583**, 3665–3670 (2009).
13. Jung, W. S. *et al.* Structural and functional insights into intramolecular fructosyl transfer by inulin fructotransferase. *J. Biol. Chem.* **282**, 8414–8423 (2007).
14. Stender, E. G. P. *et al.* Structural and functional aspects of mannuronic acid-specific PL6 alginate lyase from the human gut microbe *Bacteroides cellulosilyticus*. *J. Biol. Chem.* **294**, 17915–17930 (2019).
15. Boraston, A. B. & Abbott, D. W. Structure of a pectin methylesterase from *Yersinia enterocolitica*. *Acta Crystallogr. Sect. F Struct. Biol. Cryst. Commun.* **68**, 129–133 (2012).
16. Krissinel, E. & Henrick, K. Secondary-structure matching (SSM), a new tool for fast protein structure alignment in three dimensions. *Acta Crystallogr. Sect. D Biol. Crystallogr.* **60**, 2256–2268 (2004).
